# Supplementary material for: Synthesis and antioxidant activity of 1,3,4-oxadiazoles and their diacylhydrazine precursors derived from phenolic acids
Source: Royal Society of Chemistry journal article supplement (doi:10.1039/c6ra28787e), 2017-01-01
Supplement: c6ra28787e1.pdf [file c6ra28787e1.pdf]

## Supplementary Data

### Synthesis and antioxidant activity of 1,3,4-oxadiazoles and their diacylhydrazine precursors derived from phenolic acids

Nevena Mihailović,<sup>a</sup> Violeta Marković,<sup>a</sup> Ivana Z. Matić,<sup>b</sup> Nemanja S. Stanisavljević,<sup>c</sup> Živko S. Jovanović,<sup>c</sup> Snežana Trifunović,<sup>d</sup> Ljubinka Joksović<sup>a,\*</sup>

<sup>a</sup> Faculty of Science, Department of Chemistry, University of Kragujevac, R. Domanovića 12, 34000 Kragujevac, Serbia

<sup>b</sup> Institute of Oncology and Radiology of Serbia, Pasterova 14, 11000 Belgrade, Serbia

<sup>c</sup> Institute of Molecular Genetics and Genetic Engineering, University of Belgrade, Vojvode Stepe 444a, 11000 Belgrade, Serbia

<sup>d</sup> Faculty of Chemistry, University of Belgrade, Studentski trg 12–16, 11000 Belgrade, Serbia

---

\*Corresponding author. *E-mail address:* [ljubinka@kg.ac.rs](mailto:ljubinka@kg.ac.rs) (Lj. Joksović).

**Contents:**

|                                                                                                       |               |
|-------------------------------------------------------------------------------------------------------|---------------|
| <b>Spectral data for compounds 6b, 7a, 7b and 7d</b>                                                  | <b>S3</b>     |
| <b>Copies of <math>^1\text{H}</math> and <math>^{13}\text{C}</math> NMR spectra for 6a-h and 7a-h</b> | <b>S4-S35</b> |

*N'*-Benzoyl-3-hydroxybenzohydrazide  $\times 0.5 H_2O$  (**6b**): Beige powder; yield: 0.20 g (74%); mp: > 250°C;  $^1H$  NMR (200 MHz, DMSO- $d_6$ ): 6.97, (dt, 1H,  $J = 7.4$  and 2.2 Hz, Ar-H); 7.30-7.34, (m, 3H, Ar-H); 7.47-7.60, (m, 3H, Ar-H); 7.92, (dd, 2H,  $J = 8.0$  and 1.6 Hz, Ar-H); 9.76, (s, 1H, OH); 10.40, (d,  $J = 1.0$  Hz, 1H, NH); 10.47, (d,  $J = 1.0$  Hz, 1H, NH);  $^{13}C$  NMR (50 MHz, DMSO- $d_6$ ): 114.6, 118.0, 118.8, 127.5 (2C), 128.5 (2C), 129.6, 131.8, 132.8, 134.2, 157.5, 165.9, 166.0; IR (KBr,  $cm^{-1}$ ): 3245; 3067; 1614; 1586; 1508; 1476; 1307; 749; Anal. Calcd. For  $C_{14}H_{12}N_2O_3 \times 0.5H_2O$  (265.27 g/mol): C, 63.39; H, 4.94; N, 10.56; Found: C, 63.42; H, 4.95; N, 10.54.

2-(5-Phenyl-1,3,4-oxadiazol-2-yl)phenol (**7a**): White powder; yield: 0.16 g (66%); mp: 158 - 159°C;  $^1H$  NMR (200 MHz, DMSO- $d_6$ ): 7.01-7.14, (m, 2H, Ar-H); 7.45-7.54, (m, 1H, Ar-H); 7.61-7.68, (m, 3H, Ar-H); 7.93, (dd, 1H,  $J = 7.4$  and 1.6 Hz, Ar-H); 8.08-8.13, (m, 2H, Ar-H); 10.34, (s, 1H, OH);  $^{13}C$  NMR (50 MHz, DMSO- $d_6$ ): 109.6, 117.3, 119.9, 123.4, 126.8 (2C), 128.9, 129.6 (2C), 132.2, 133.6, 156.5, 163.5, 163.7; IR (KBr,  $cm^{-1}$ ): 3444; 3206; 1624; 1593; 1542; 1489; 1254; 1240; 709; Anal. Calcd. For  $C_{14}H_{10}N_2O_2$  (238.25 g/mol): C, 70.58; H, 4.23; N, 11.76; Found: C, 70.56; H, 4.22; N, 11.74.

3-(5-Phenyl-1,3,4-oxadiazol-2-yl)phenol  $\times 0.5 H_2O$  (**7b**): Beige powder; yield: 0.14 g (56%); mp: 179 - 180°C;  $^1H$  NMR (200 MHz, DMSO- $d_6$ ): 7.04, (dq, 1H,  $J = 8.2$ , 2.4 and 1.0 Hz, Ar-H); 7.43, (t, 1H,  $J = 7.8$  Hz, Ar-H); 7.51, (t, 1H,  $J = 2.0$  Hz, Ar-H); 7.57, (dt, 1H,  $J = 7.8$  and 1.2 Hz, Ar-H); 7.62-7.66, (m, 3H, Ar-H); 8.09-8.14, (m, 2H, Ar-H); 10.02, (s, 1H, OH);  $^{13}C$  NMR (50 MHz, DMSO- $d_6$ ): 113.2, 117.5, 119.3, 123.5, 124.5, 126.8 (2C), 129.5 (2C), 130.7, 132.1, 158.1, 164.0, 164.2; IR (KBr,  $cm^{-1}$ ): 3263; 3051; 1604; 1562; 1550; 1459; 1227; 726; Anal. Calcd. For  $C_{14}H_{10}N_2O_2 \times 0.5H_2O$  (247.25 g/mol): C, 68.01; H, 4.48; N, 11.33; Found: C, 68.04; H, 4.47; N, 11.35.

3-(5-Phenyl-1,3,4-oxadiazol-2-yl)benzene-1,2-diol (**7d**): Beige crystals; yield: 0.15 g (58%); mp: 172 - 173°C;  $^1H$  NMR (200 MHz, DMSO- $d_6$ ): 6.88, (t, 1H,  $J = 7.8$  Hz, Ar-H); 7.04, (dd, 1H,  $J = 7.8$  and 1.6 Hz, Ar-H); 7.39, (dd, 1H,  $J = 7.8$  and 1.6 Hz, Ar-H); 7.61-7.69, (m, 3H, Ar-H); 8.09-8.14, (m, 2H, Ar-H); 9.70, (s, 1H, OH); 9.77, (s, 1H, OH);  $^{13}C$  NMR (50 MHz, DMSO- $d_6$ ): 109.7, 118.3, 119.0, 120.1, 123.4, 126.8 (2C), 129.6 (2C), 132.2, 145.5, 146.4, 163.3, 164.0; IR (KBr,  $cm^{-1}$ ): 3439; 3297; 1624; 1610; 1551; 1494; 1284; 727; Anal. Calcd. For  $C_{14}H_{10}N_2O_3$  (254.24 g/mol): C, 66.14; H, 3.96; N, 11.02; Found: C, 66.15; H, 3.97; N, 11.00.

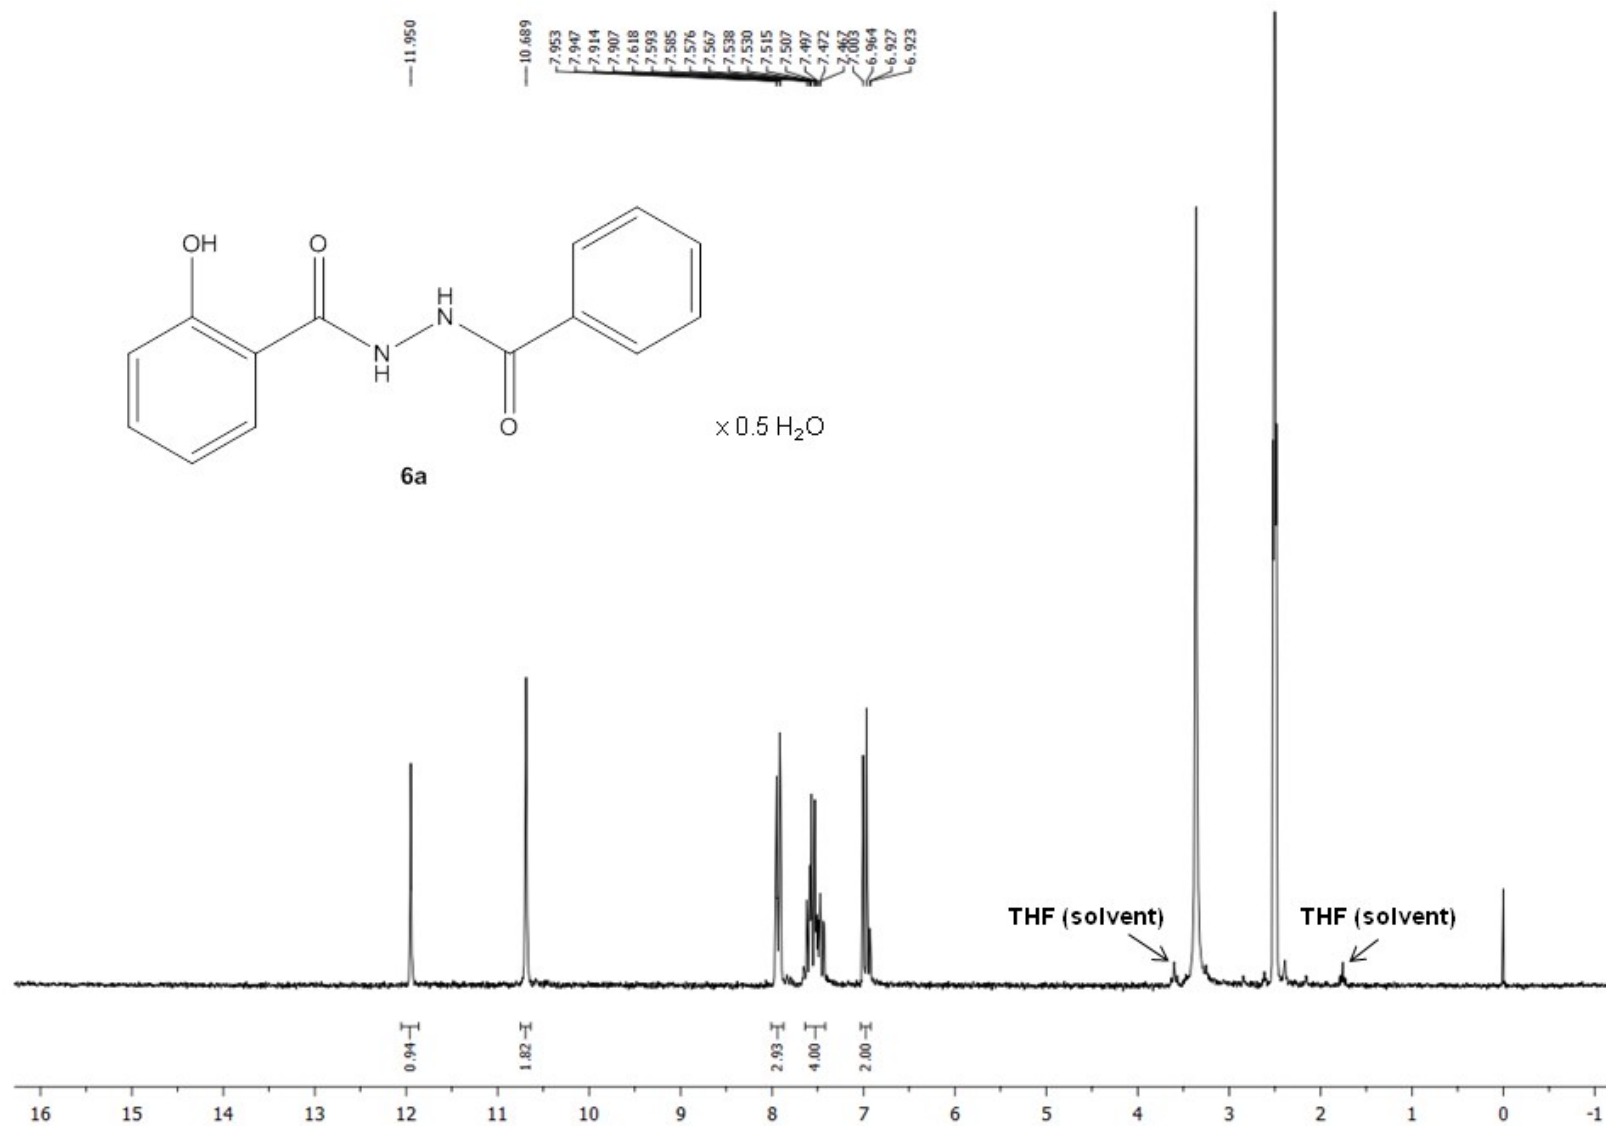

Figure S1. <sup>1</sup>H NMR spectrum of **6a** in DMSO-d<sub>6</sub> (200 MHz).

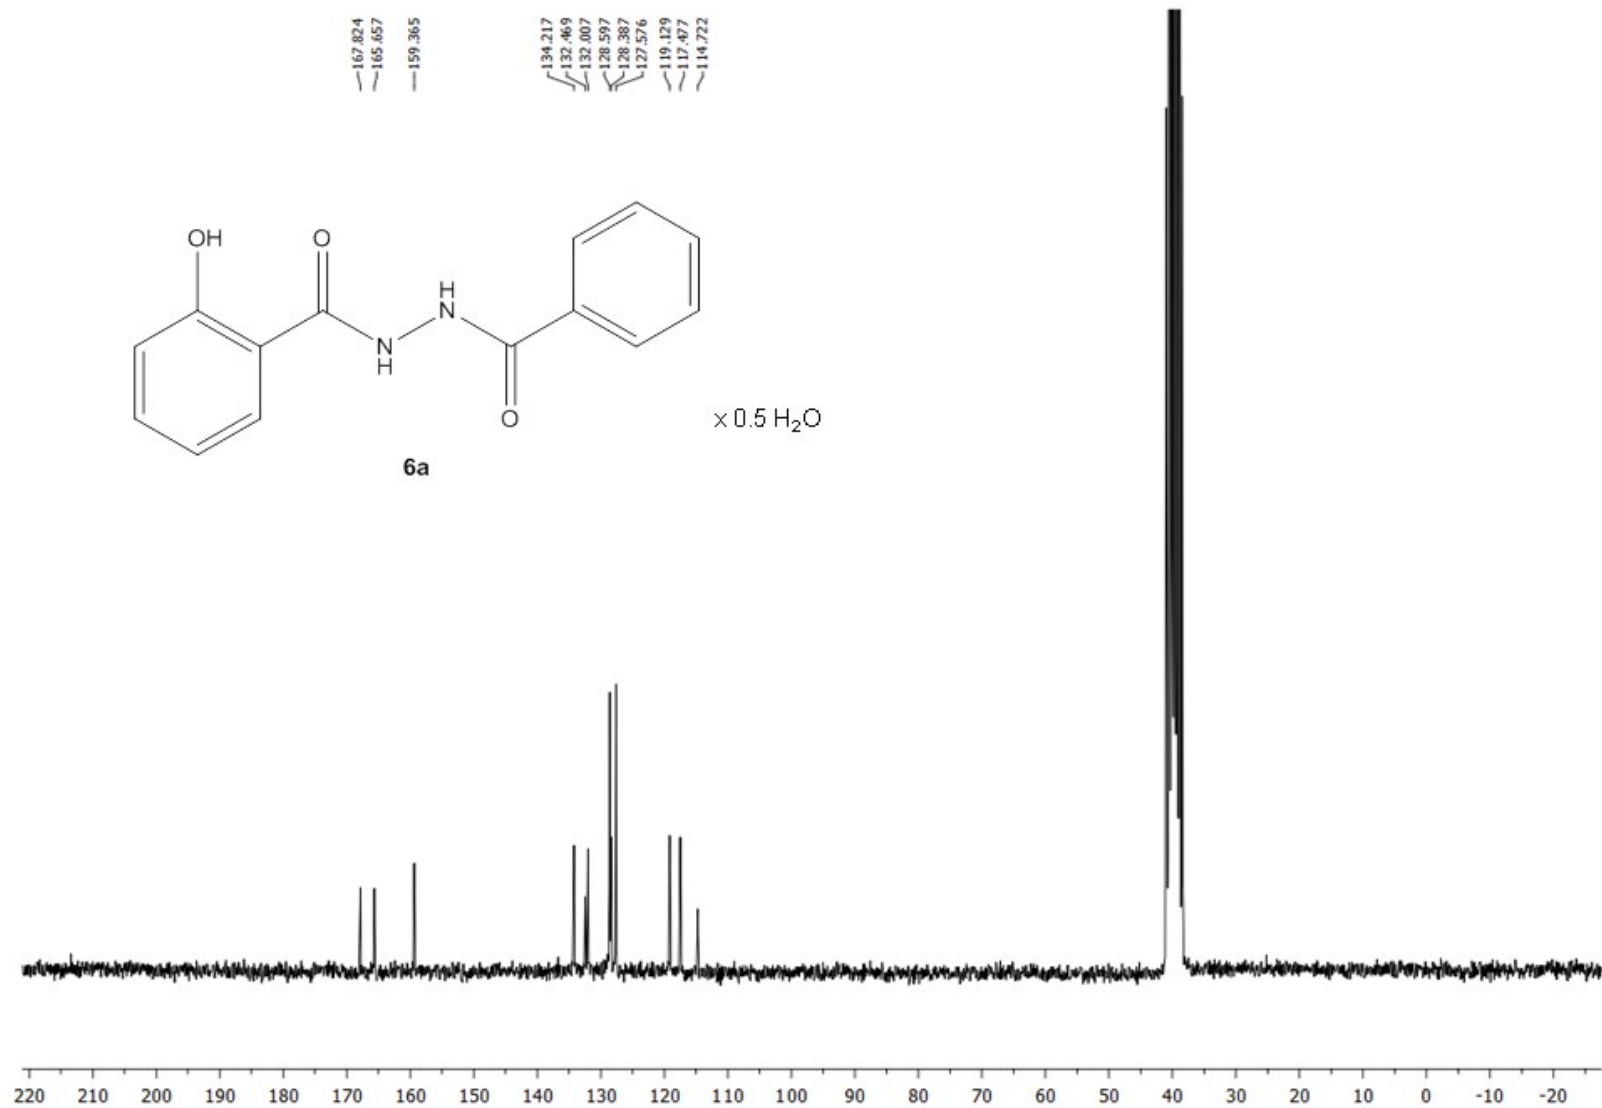

**Figure S2.**  $^{13}\text{C}$  NMR spectrum of **6a** in  $\text{DMSO-d}_6$  (50 MHz).

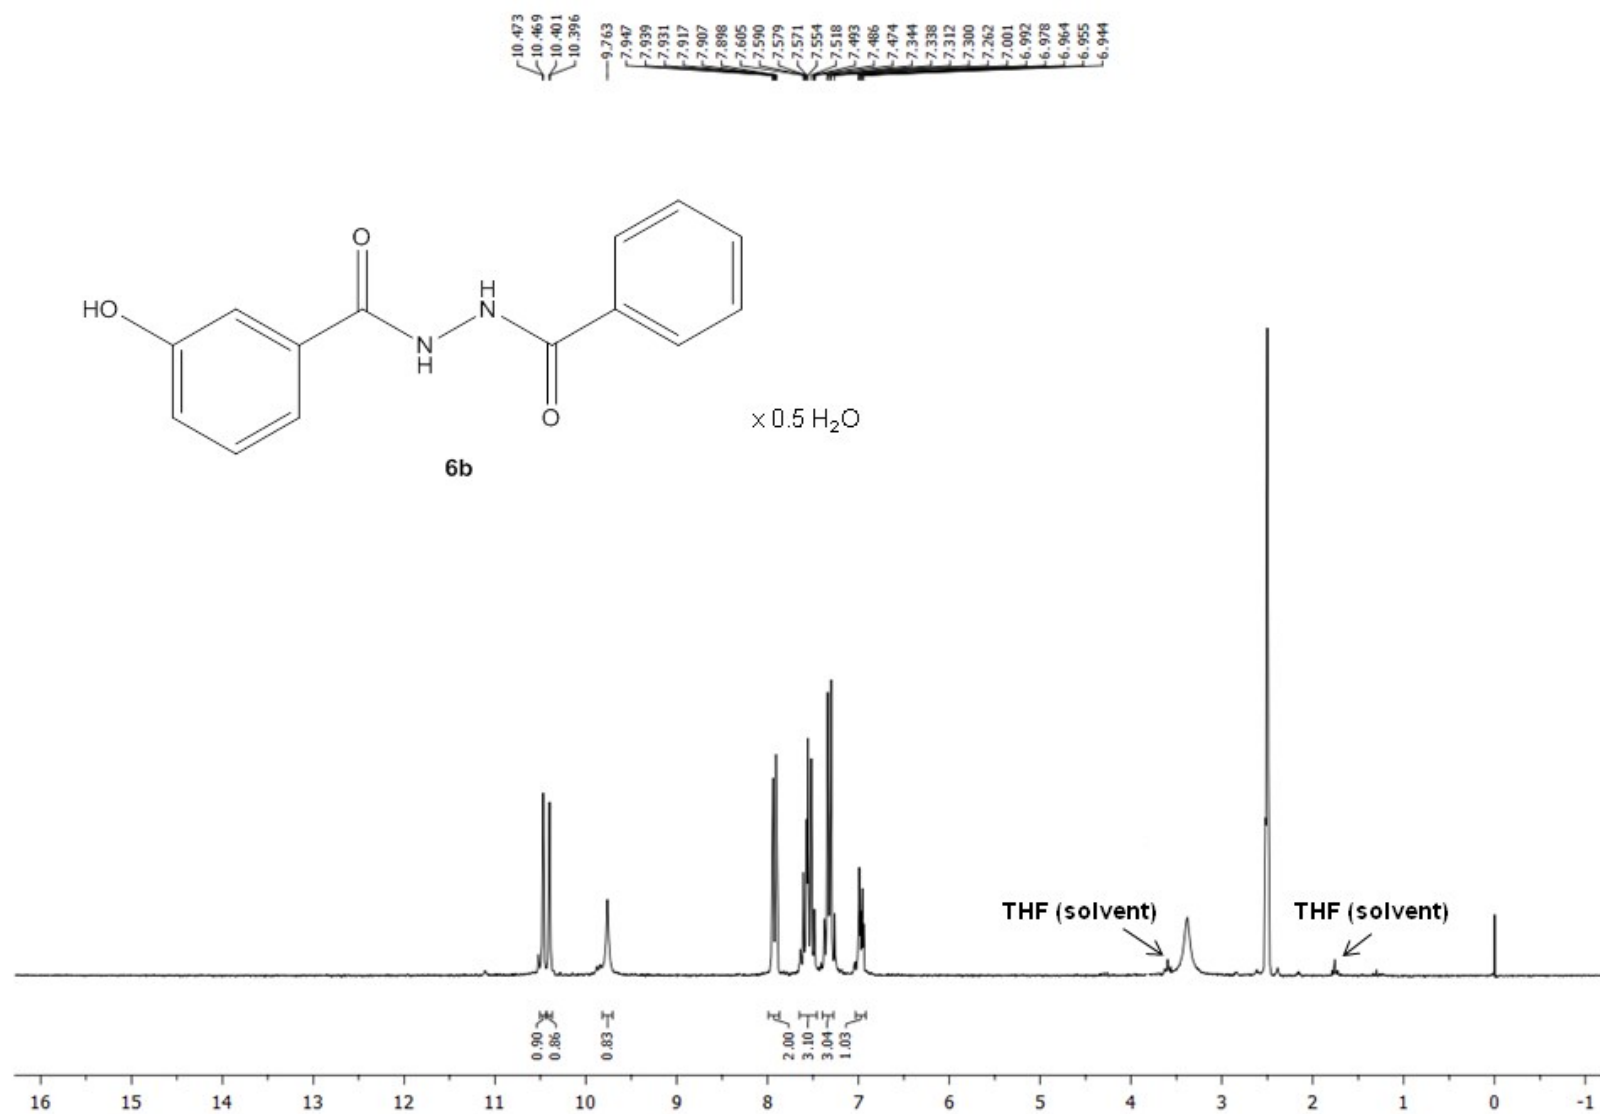

Figure S3.  $^1\text{H}$  NMR spectrum of **6b** in  $\text{DMSO-d}_6$  (200 MHz).

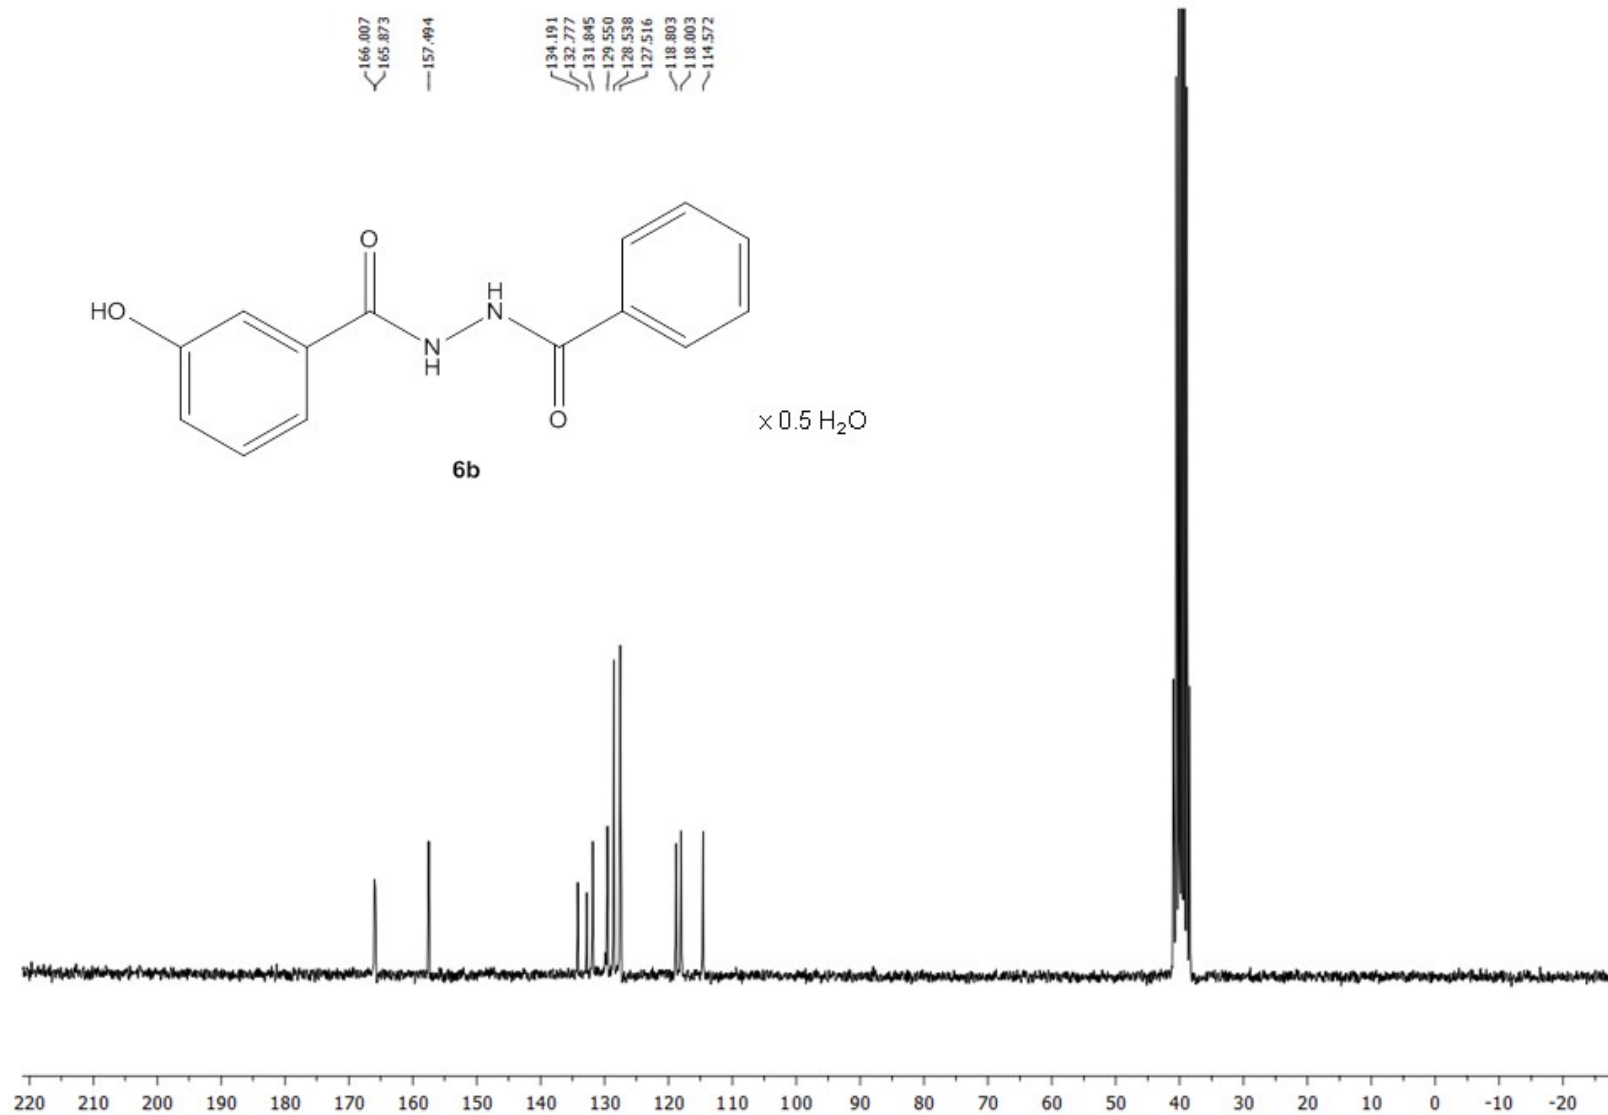

**Figure S4.** <sup>13</sup>C NMR spectrum of **6b** in DMSO-d<sub>6</sub> (50 MHz).

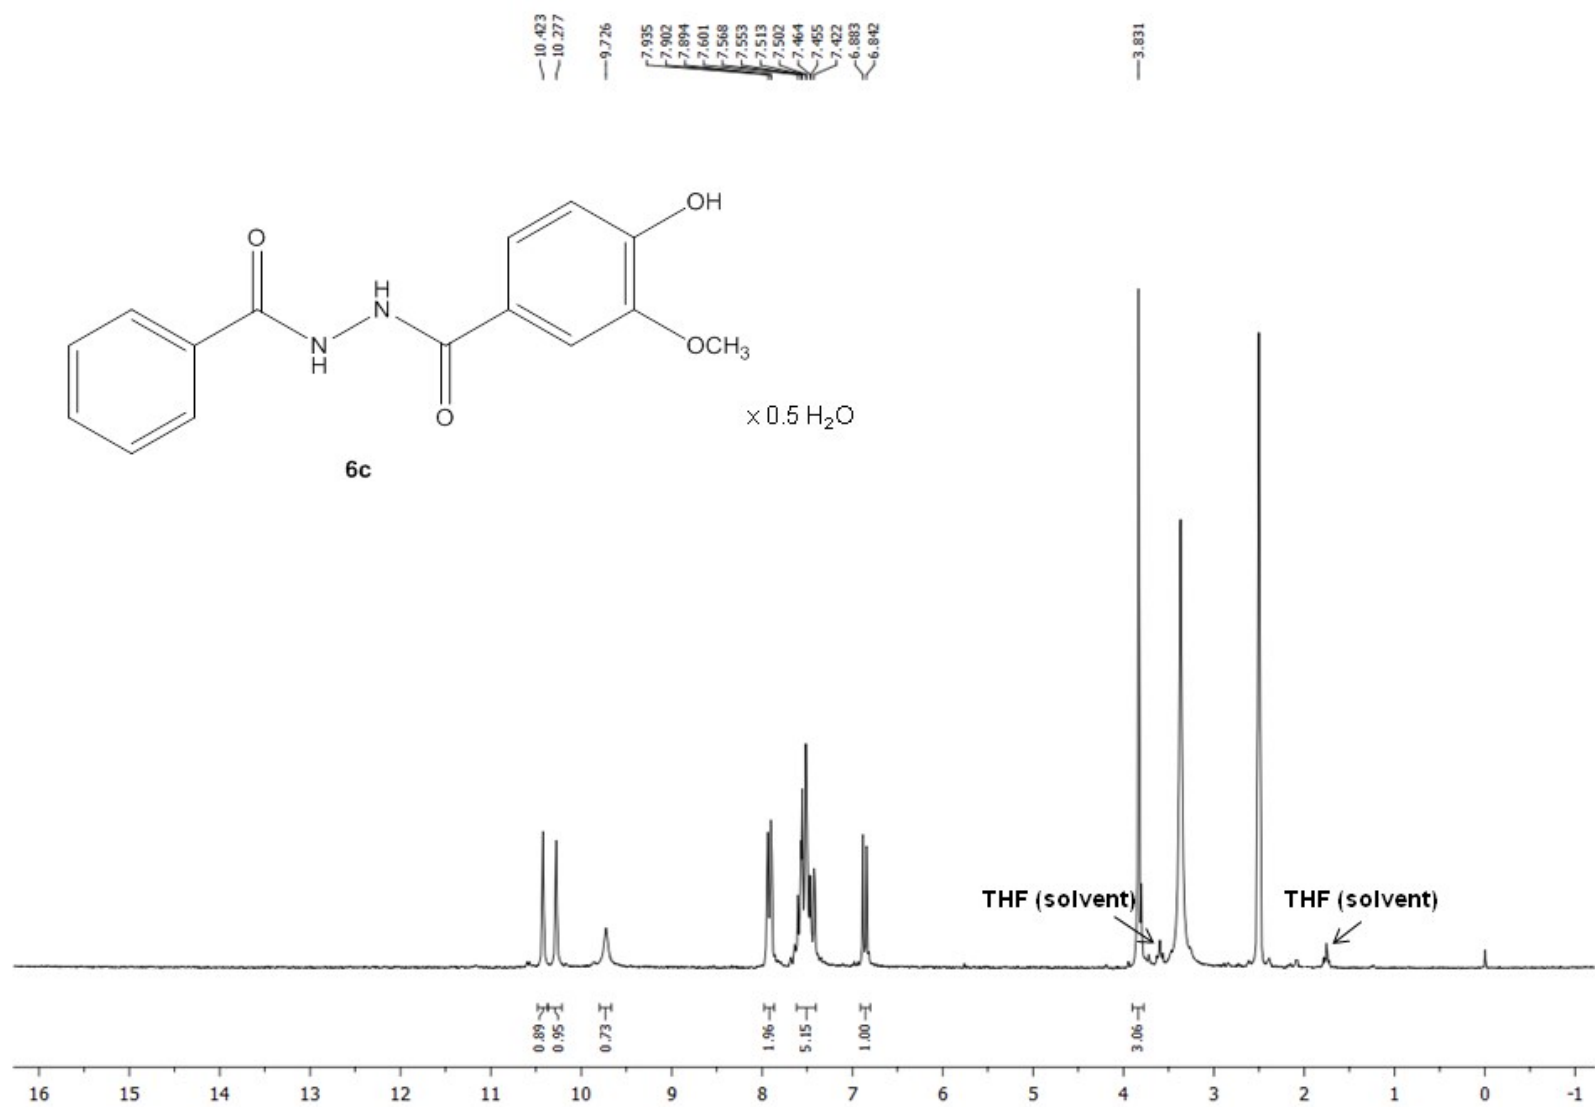

**Figure S5.** <sup>1</sup>H NMR spectrum of **6c** in DMSO-d<sub>6</sub> (200 MHz).



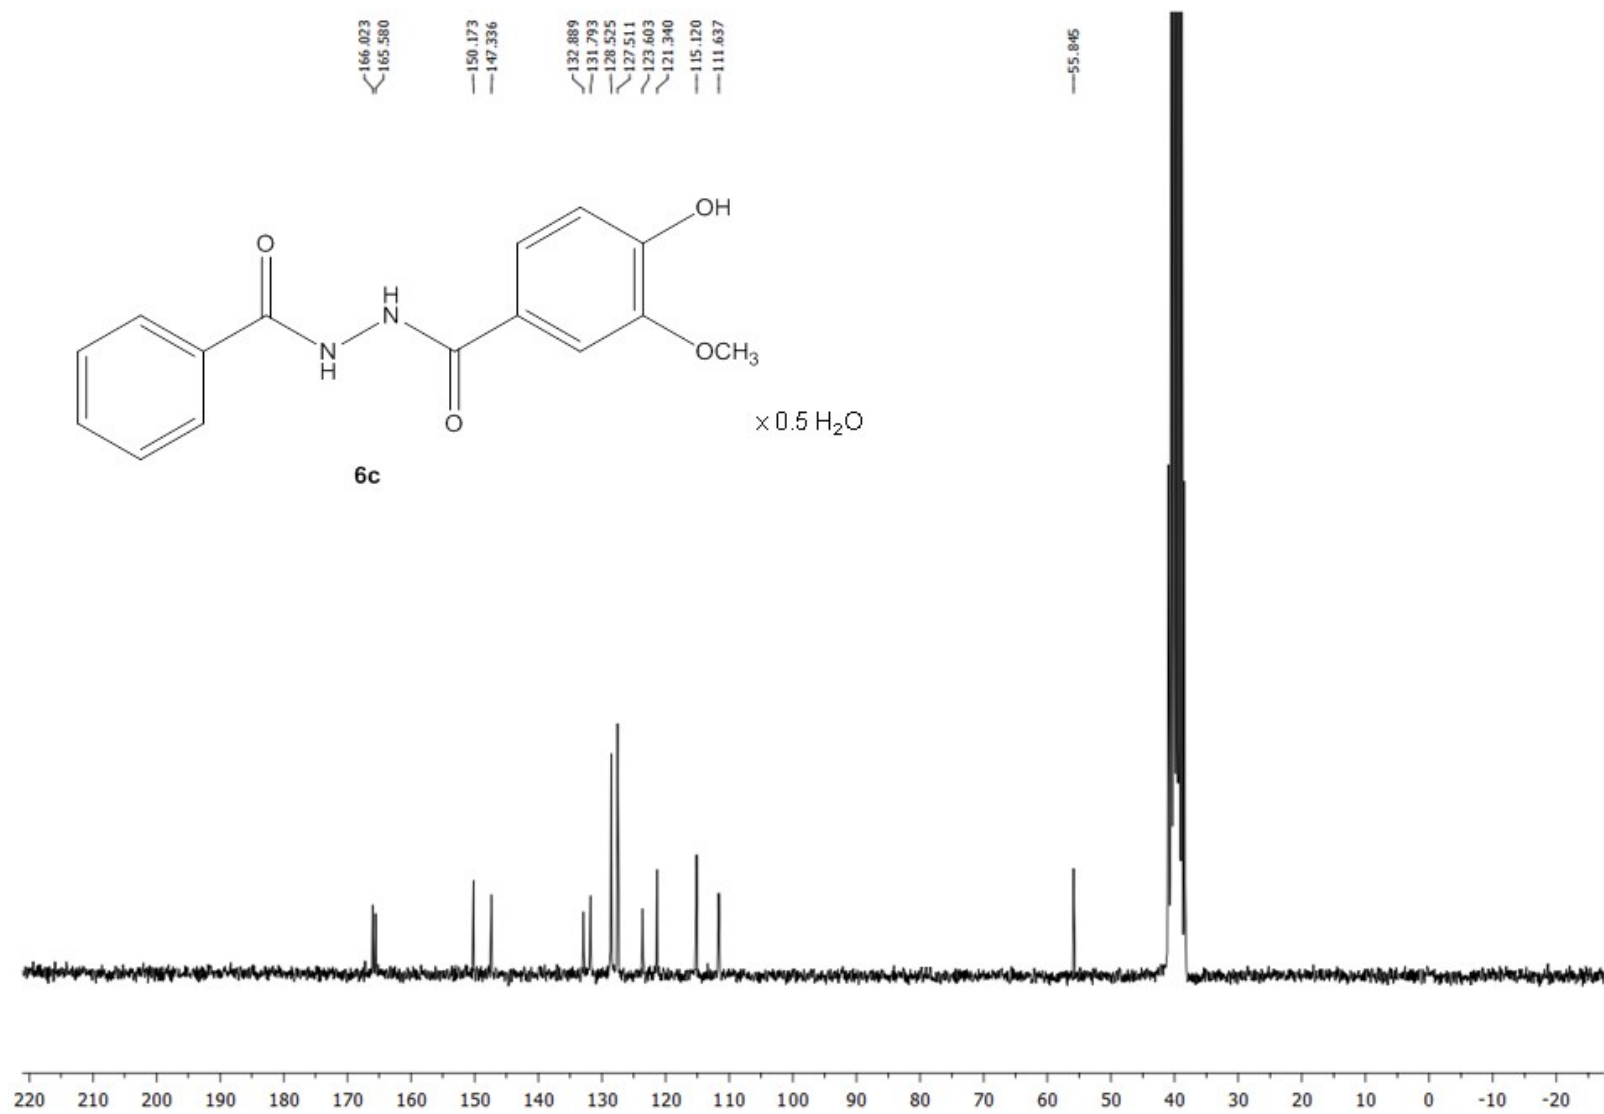

**Figure S6.**  $^{13}\text{C}$  NMR spectrum of **6c** in  $\text{DMSO-d}_6$  (50 MHz).

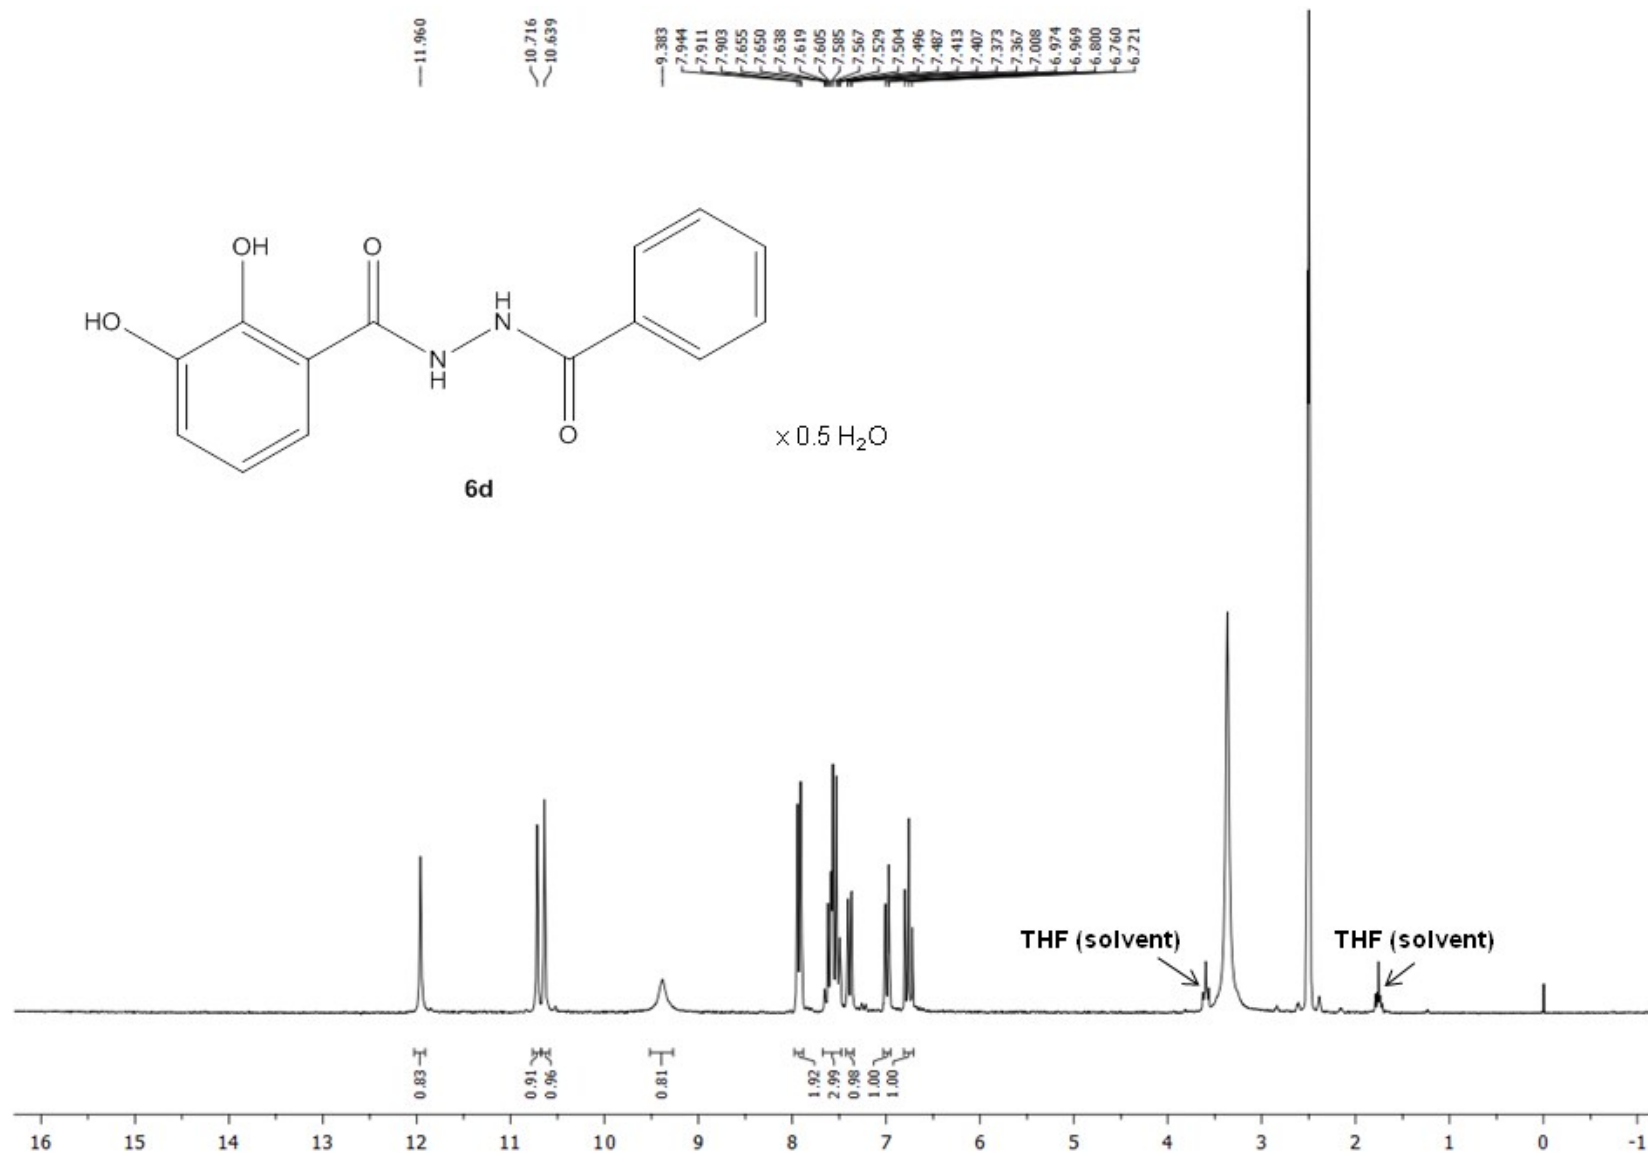

**Figure S7.**  $^1\text{H}$  NMR spectrum of **6d** in DMSO- $d_6$  (200 MHz).

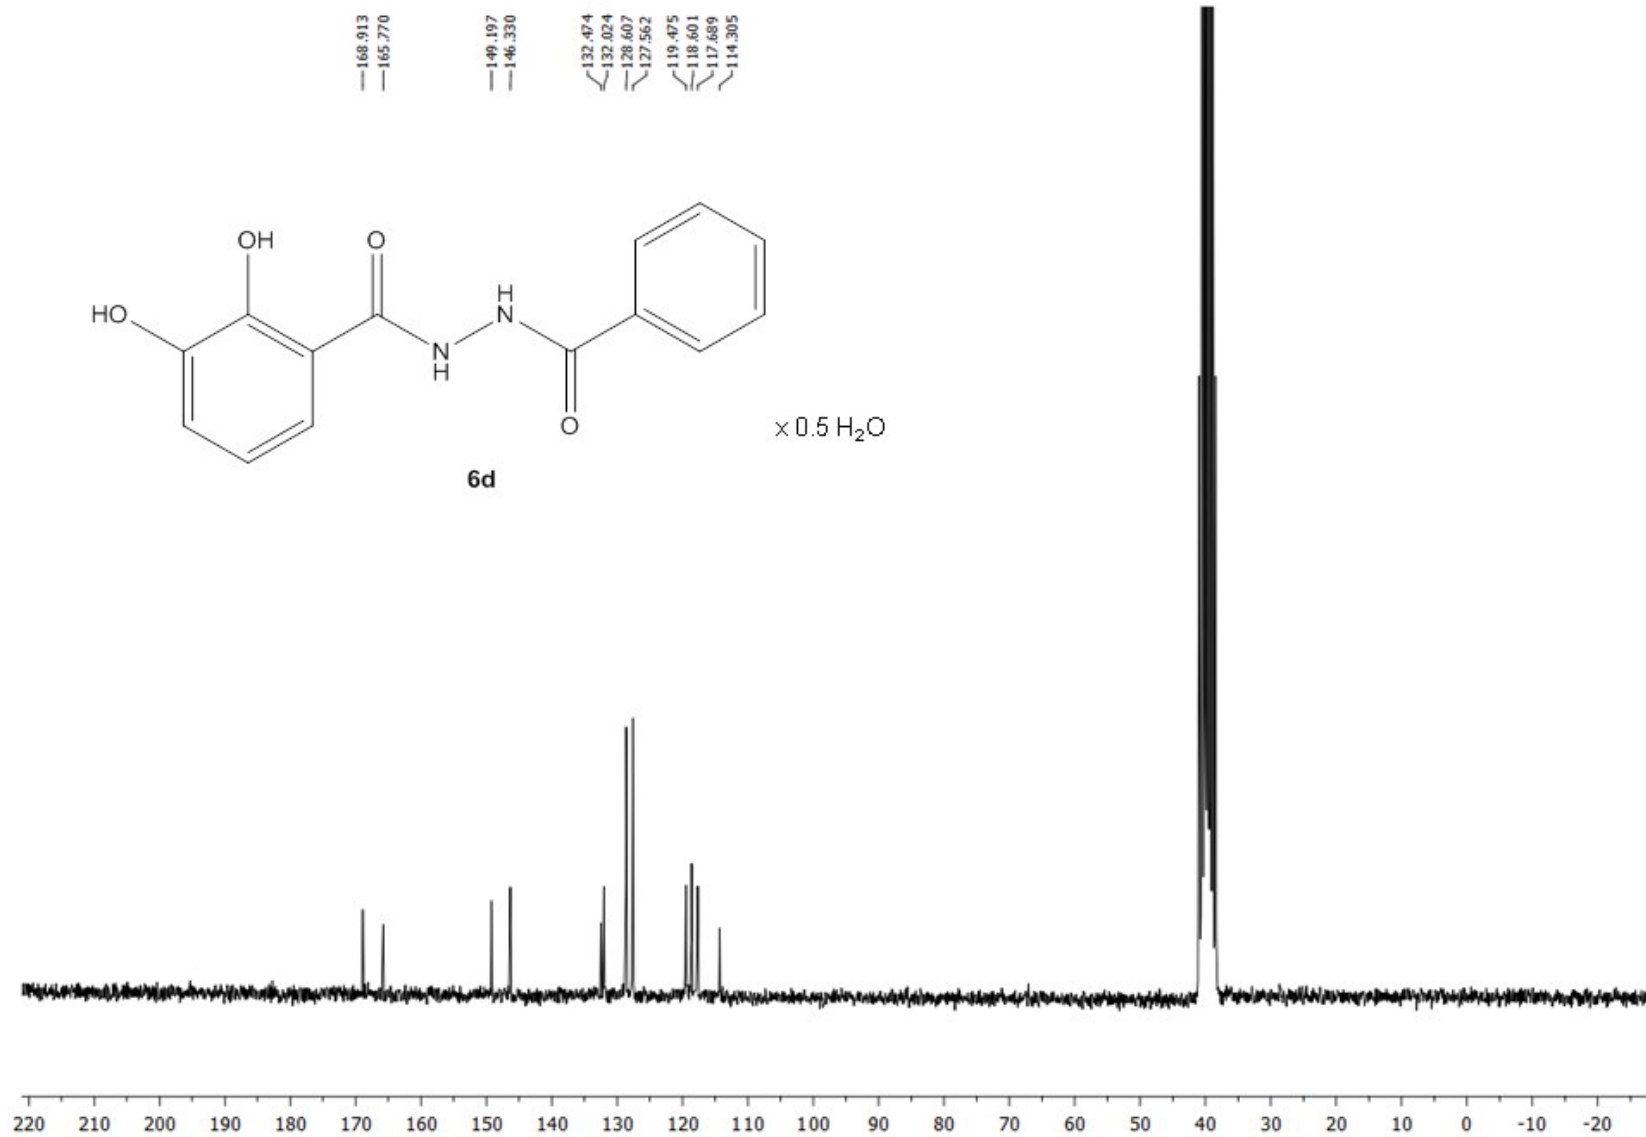

**Figure S8.**  $^{13}\text{C}$  NMR spectrum of **6d** in  $\text{DMSO-d}_6$  (50 MHz).

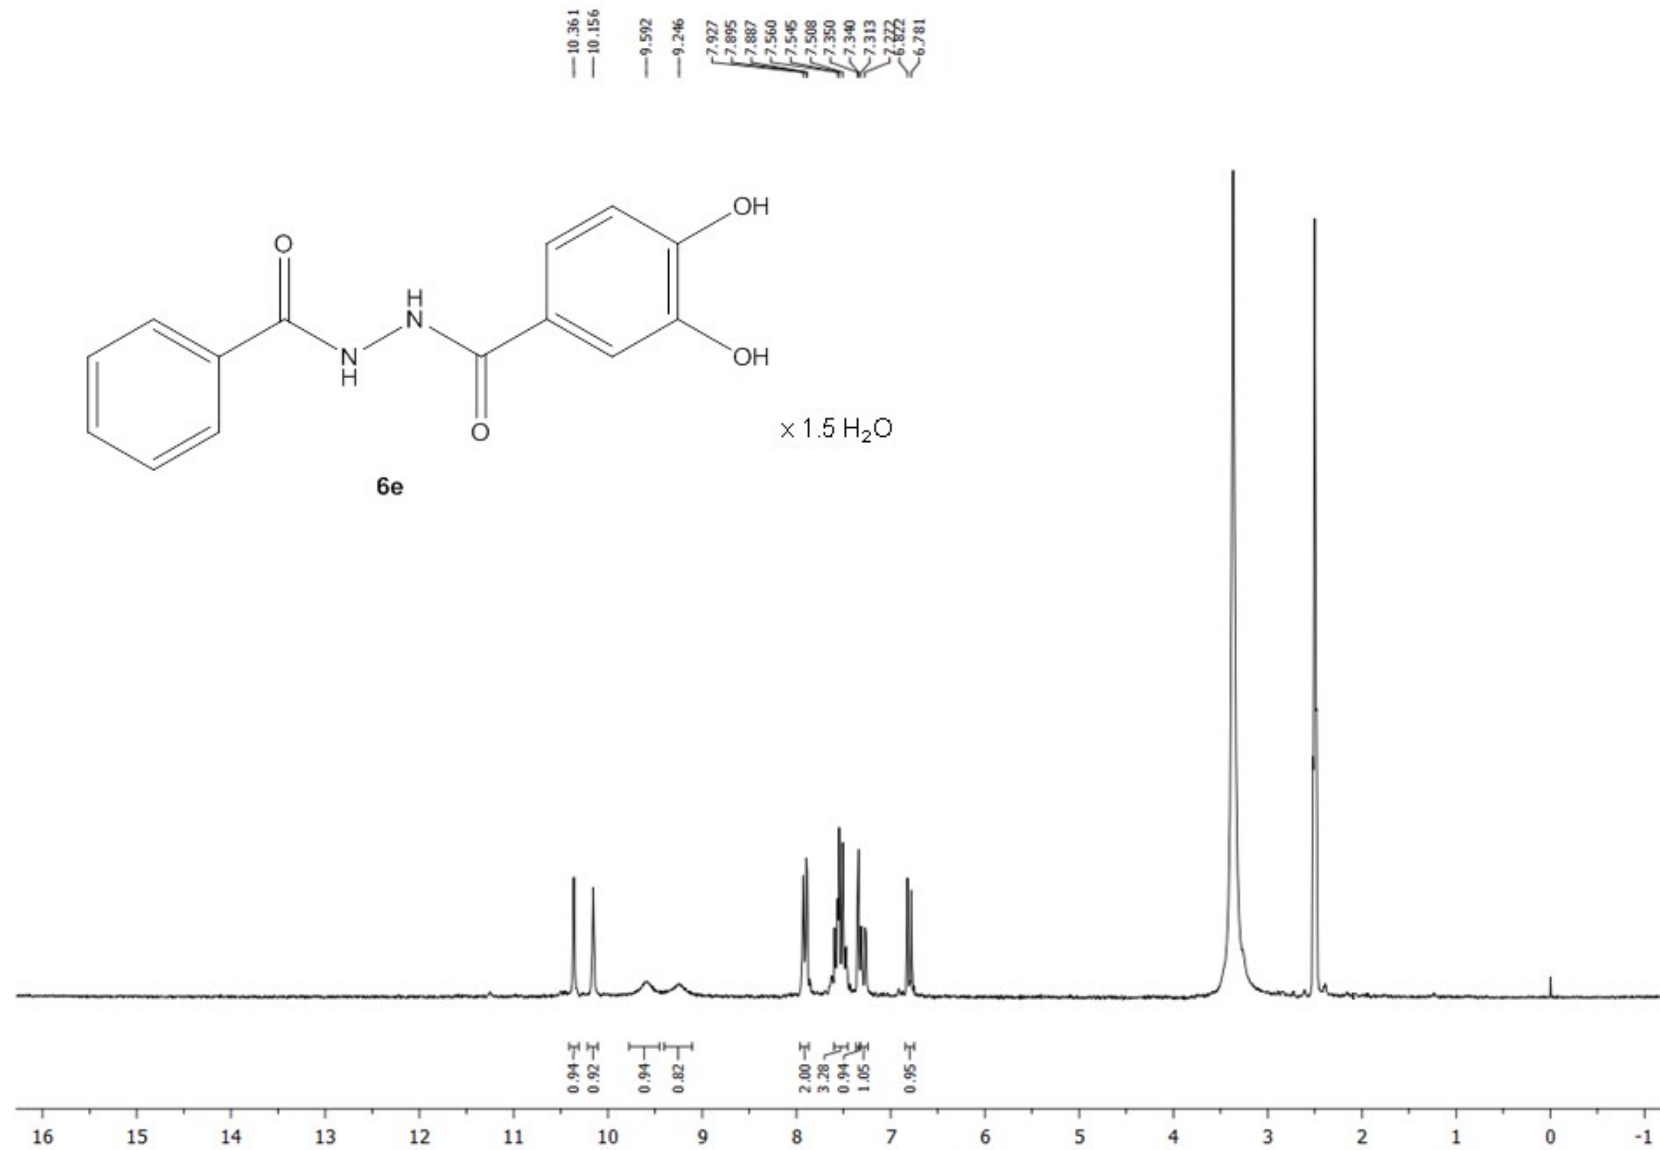

**Figure S9.**  $^1\text{H}$  NMR spectrum of **6e** in  $\text{DMSO-d}_6$  (200 MHz).

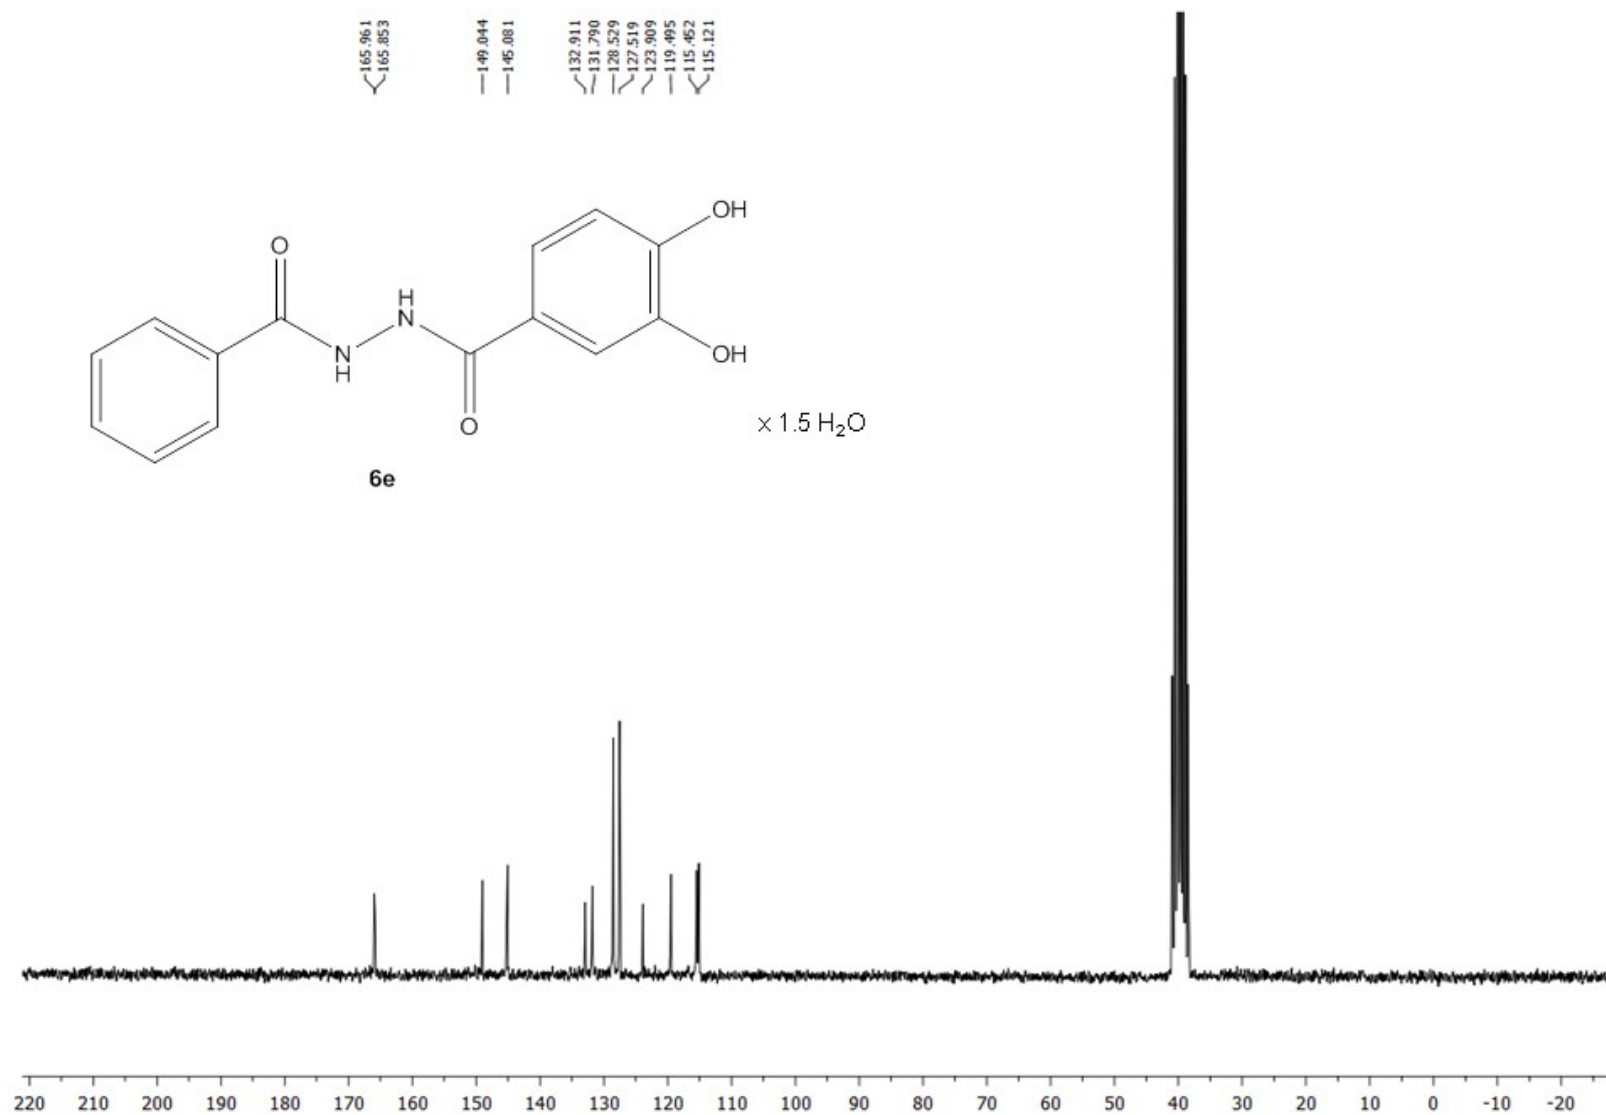

**Figure S10.**  $^{13}\text{C}$  NMR spectrum of **6e** in  $\text{DMSO-d}_6$  (50 MHz).

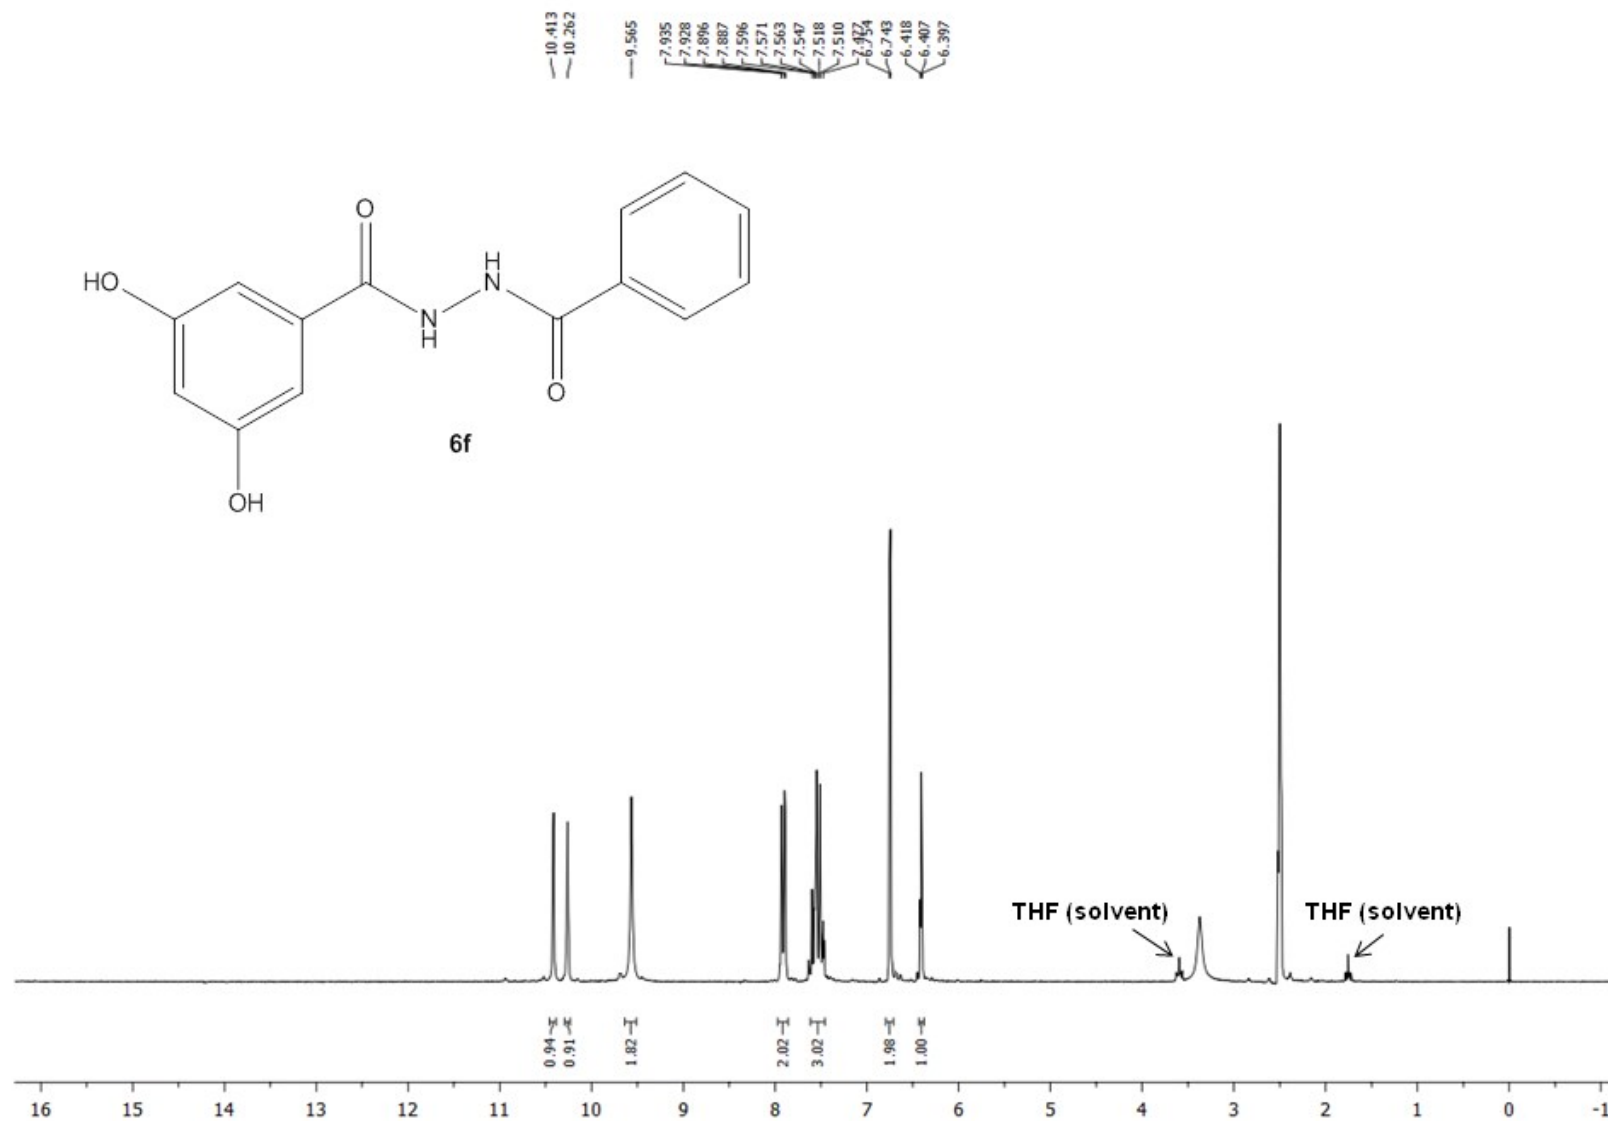

**Figure S11.**  $^1\text{H}$  NMR spectrum of **6f** in  $\text{DMSO-d}_6$  (200 MHz).

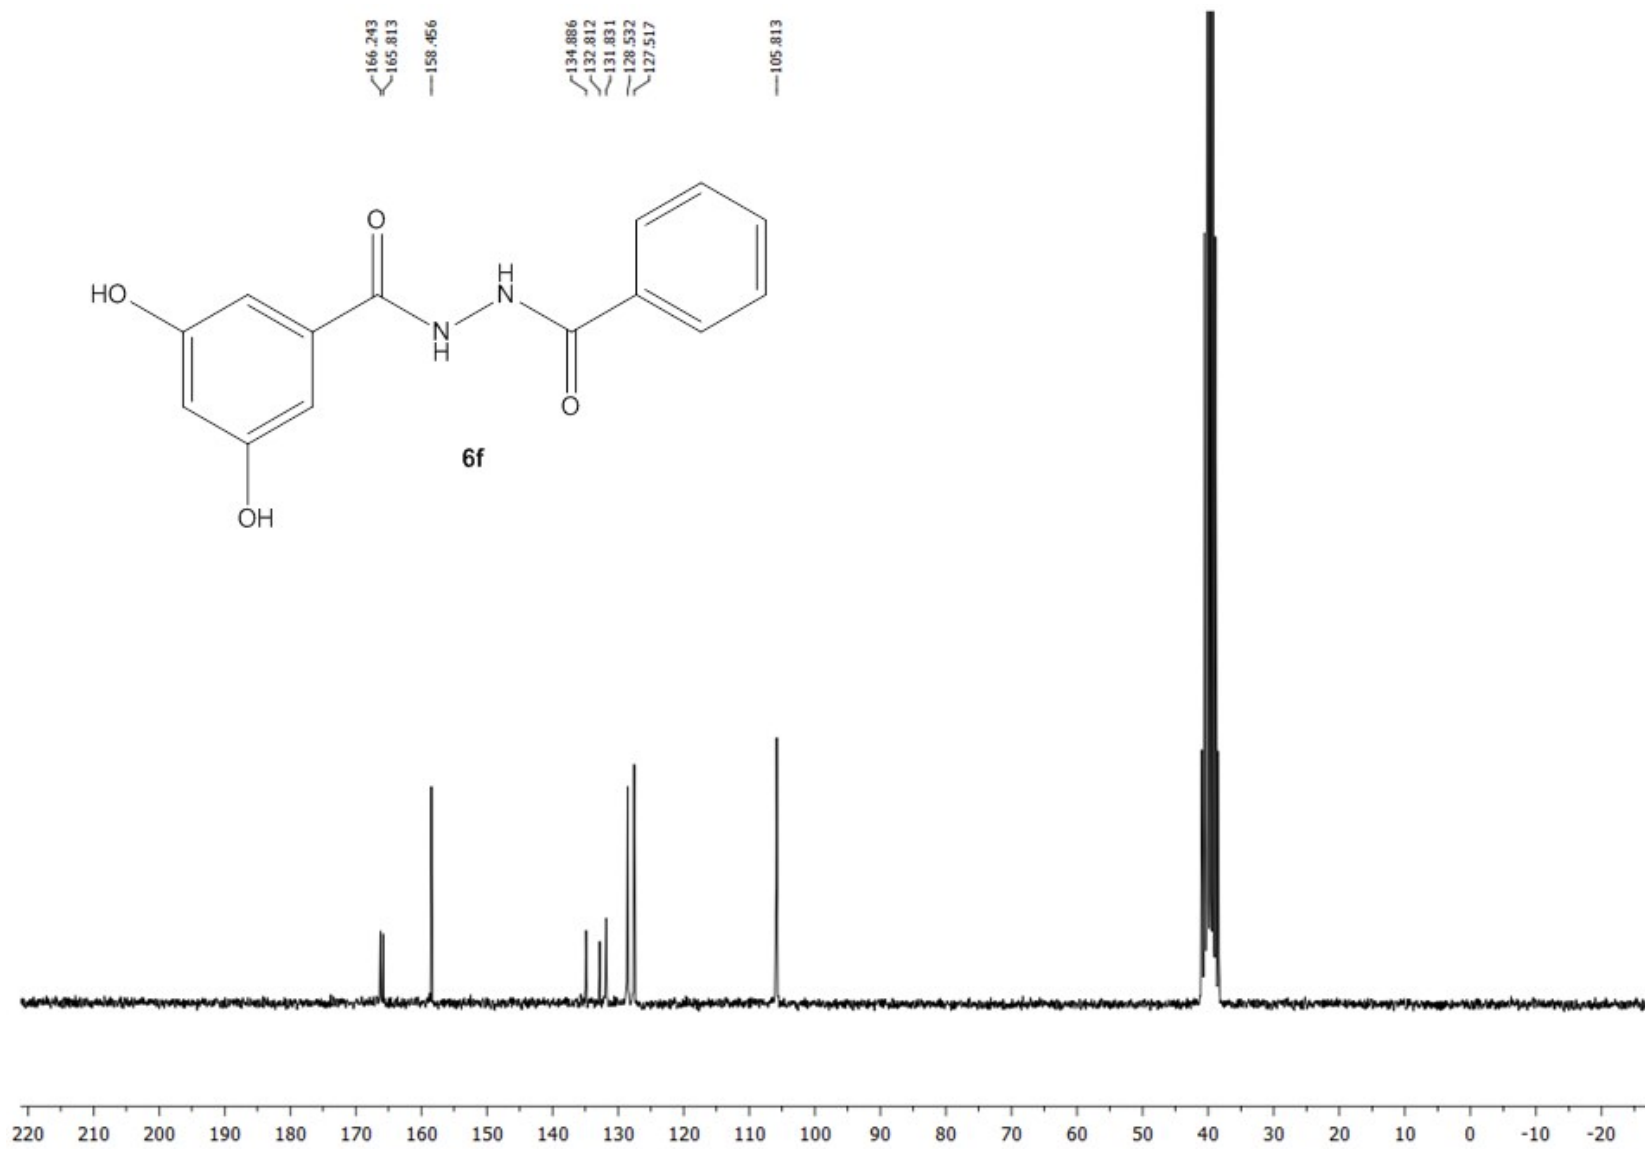

**Figure S12.**  $^{13}\text{C}$  NMR spectrum of **6f** in  $\text{DMSO-d}_6$  (50 MHz).

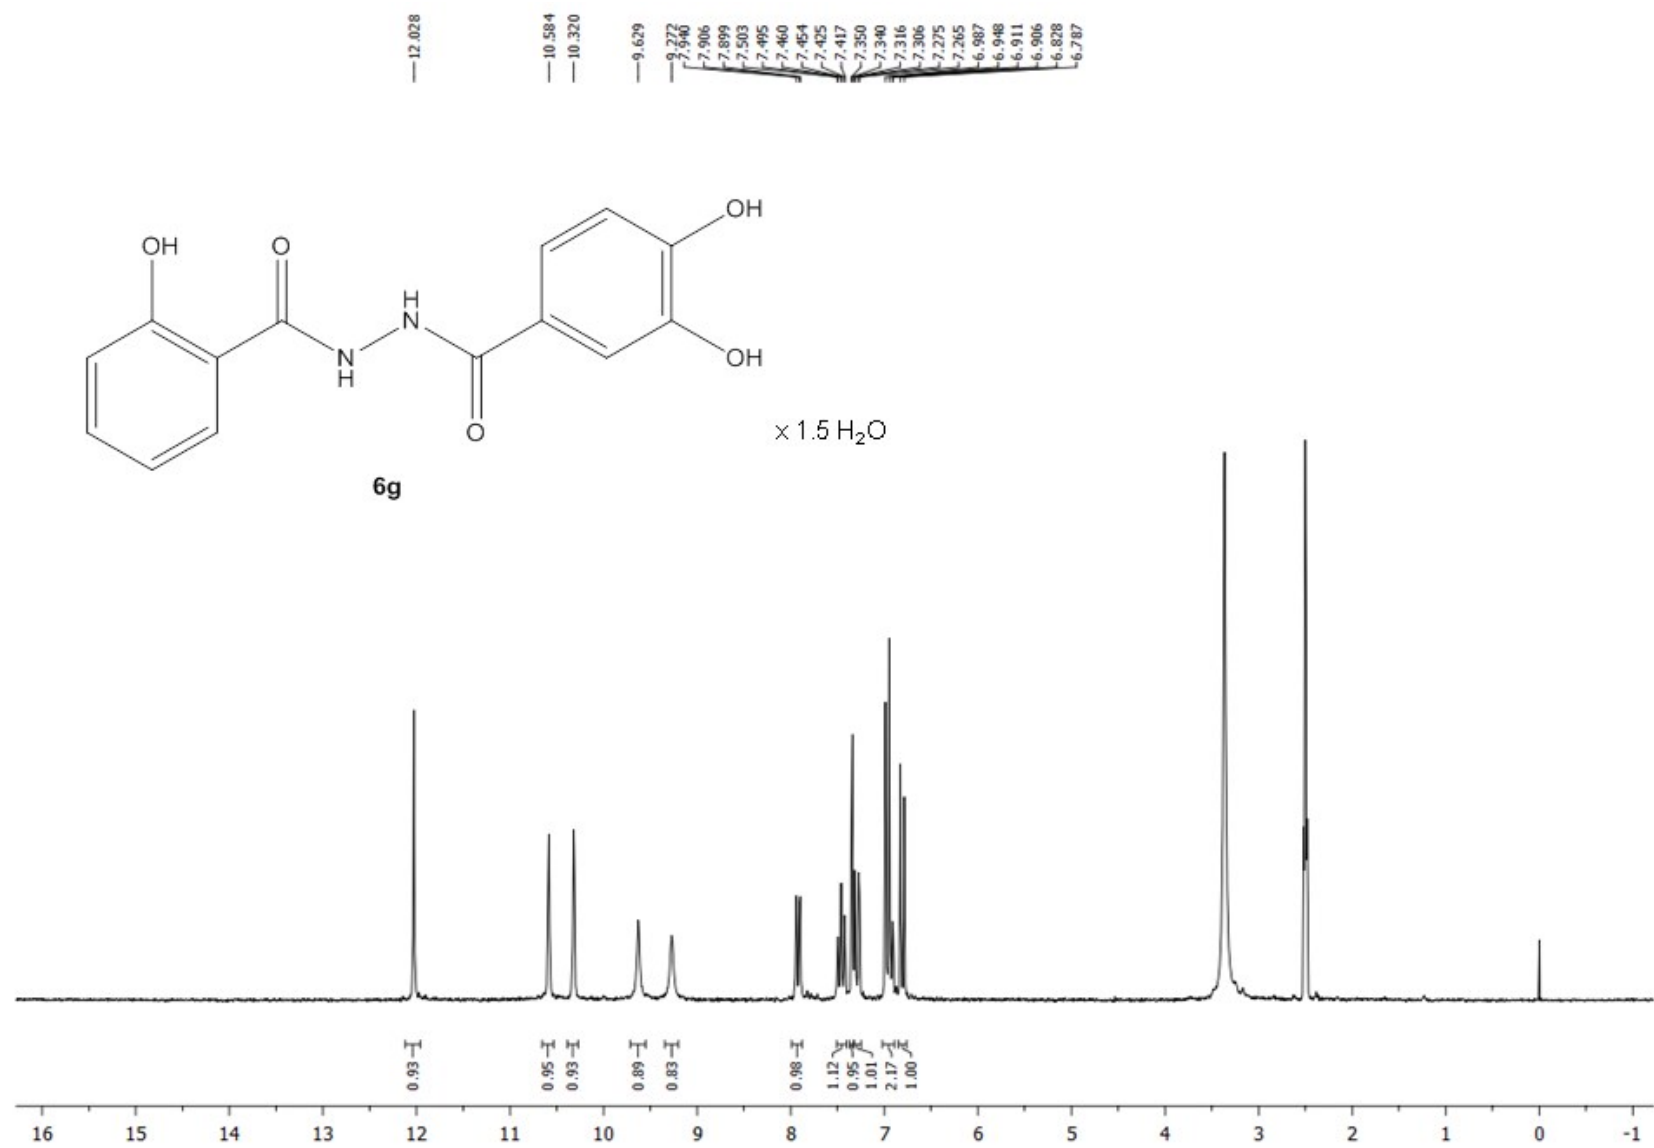

**Figure S13.** <sup>1</sup>H NMR spectrum of **6g** in DMSO-d<sub>6</sub> (200 MHz).



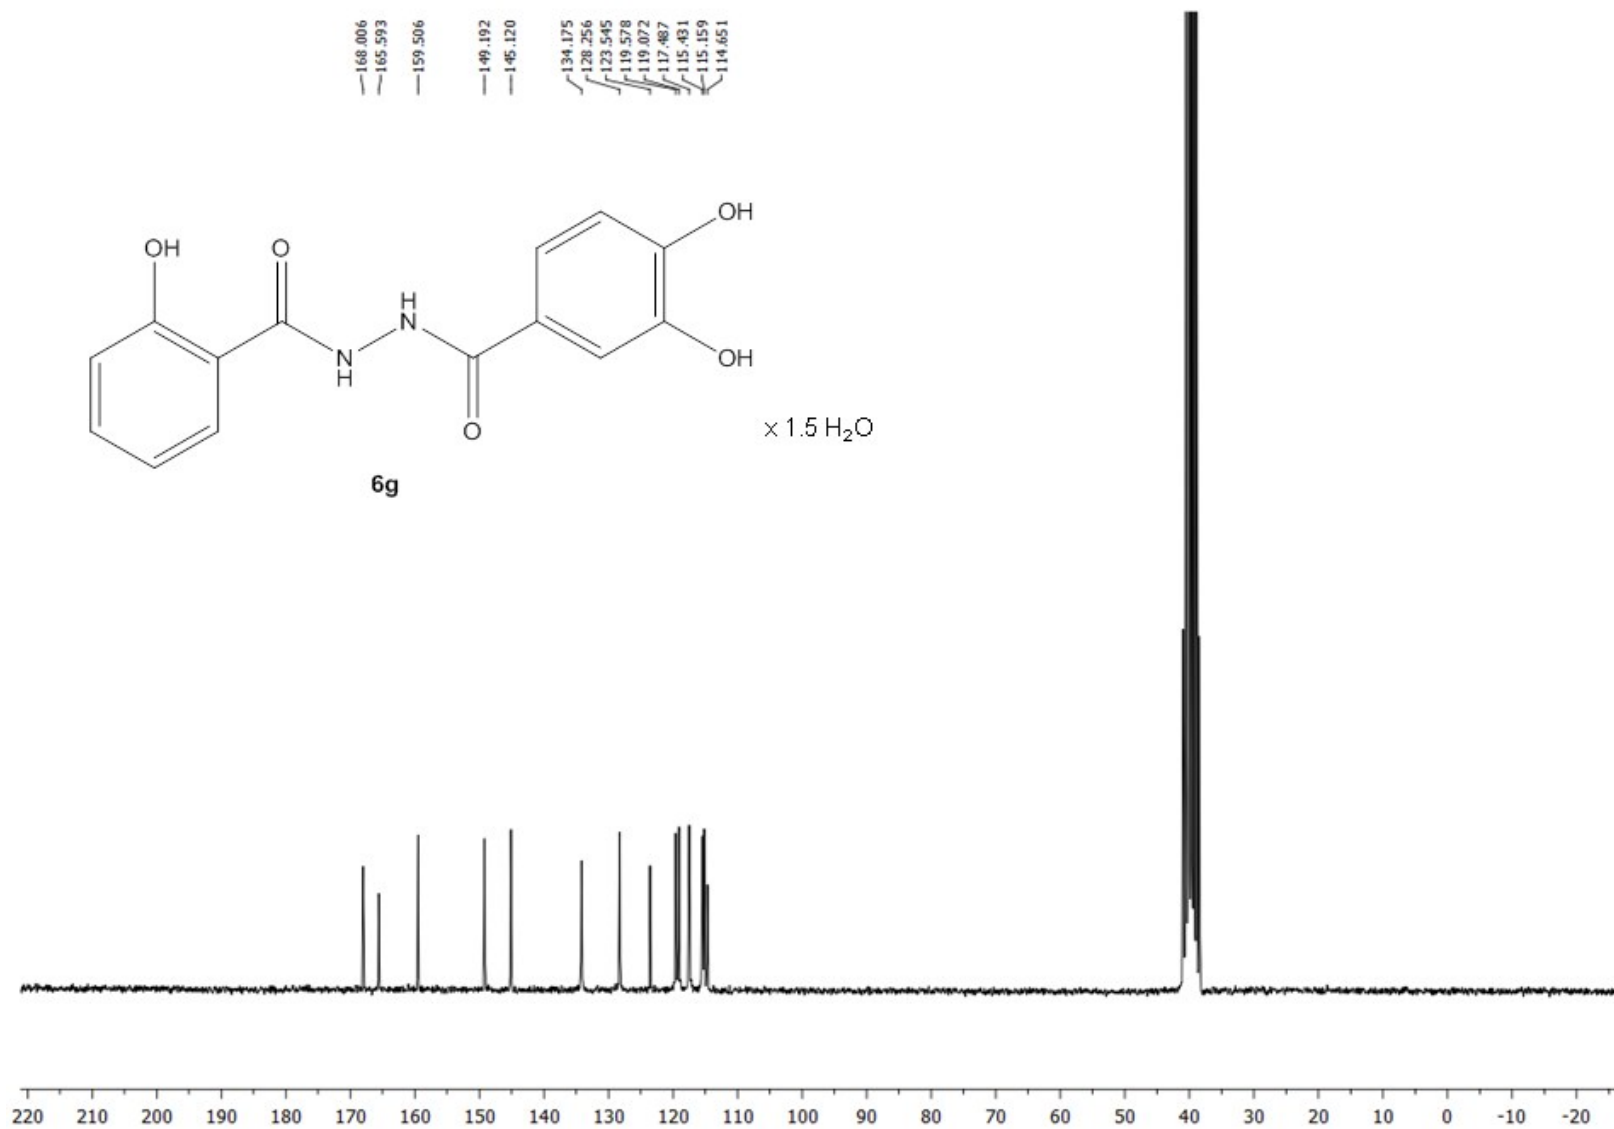

**Figure S14.**  $^{13}\text{C}$  NMR spectrum of **6g** in  $\text{DMSO-d}_6$  (50 MHz).

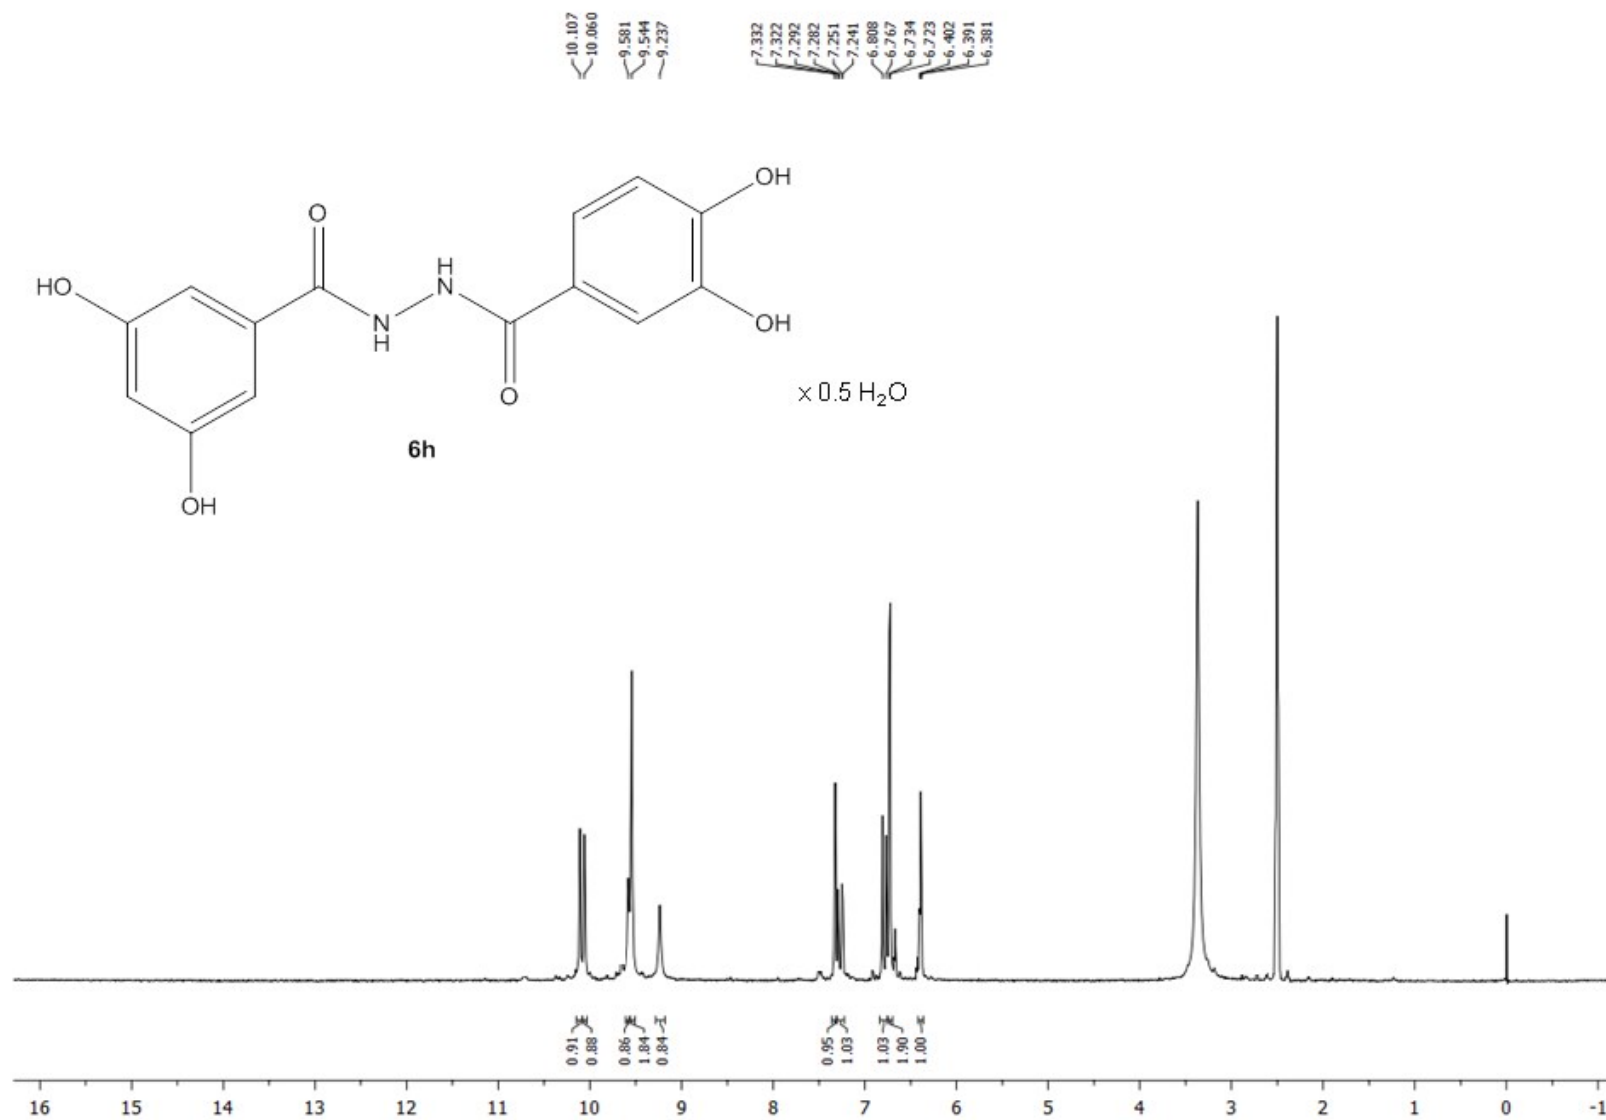

**Figure S15.**  $^1\text{H}$  NMR spectrum of **6h** in  $\text{DMSO-d}_6$  (200 MHz).

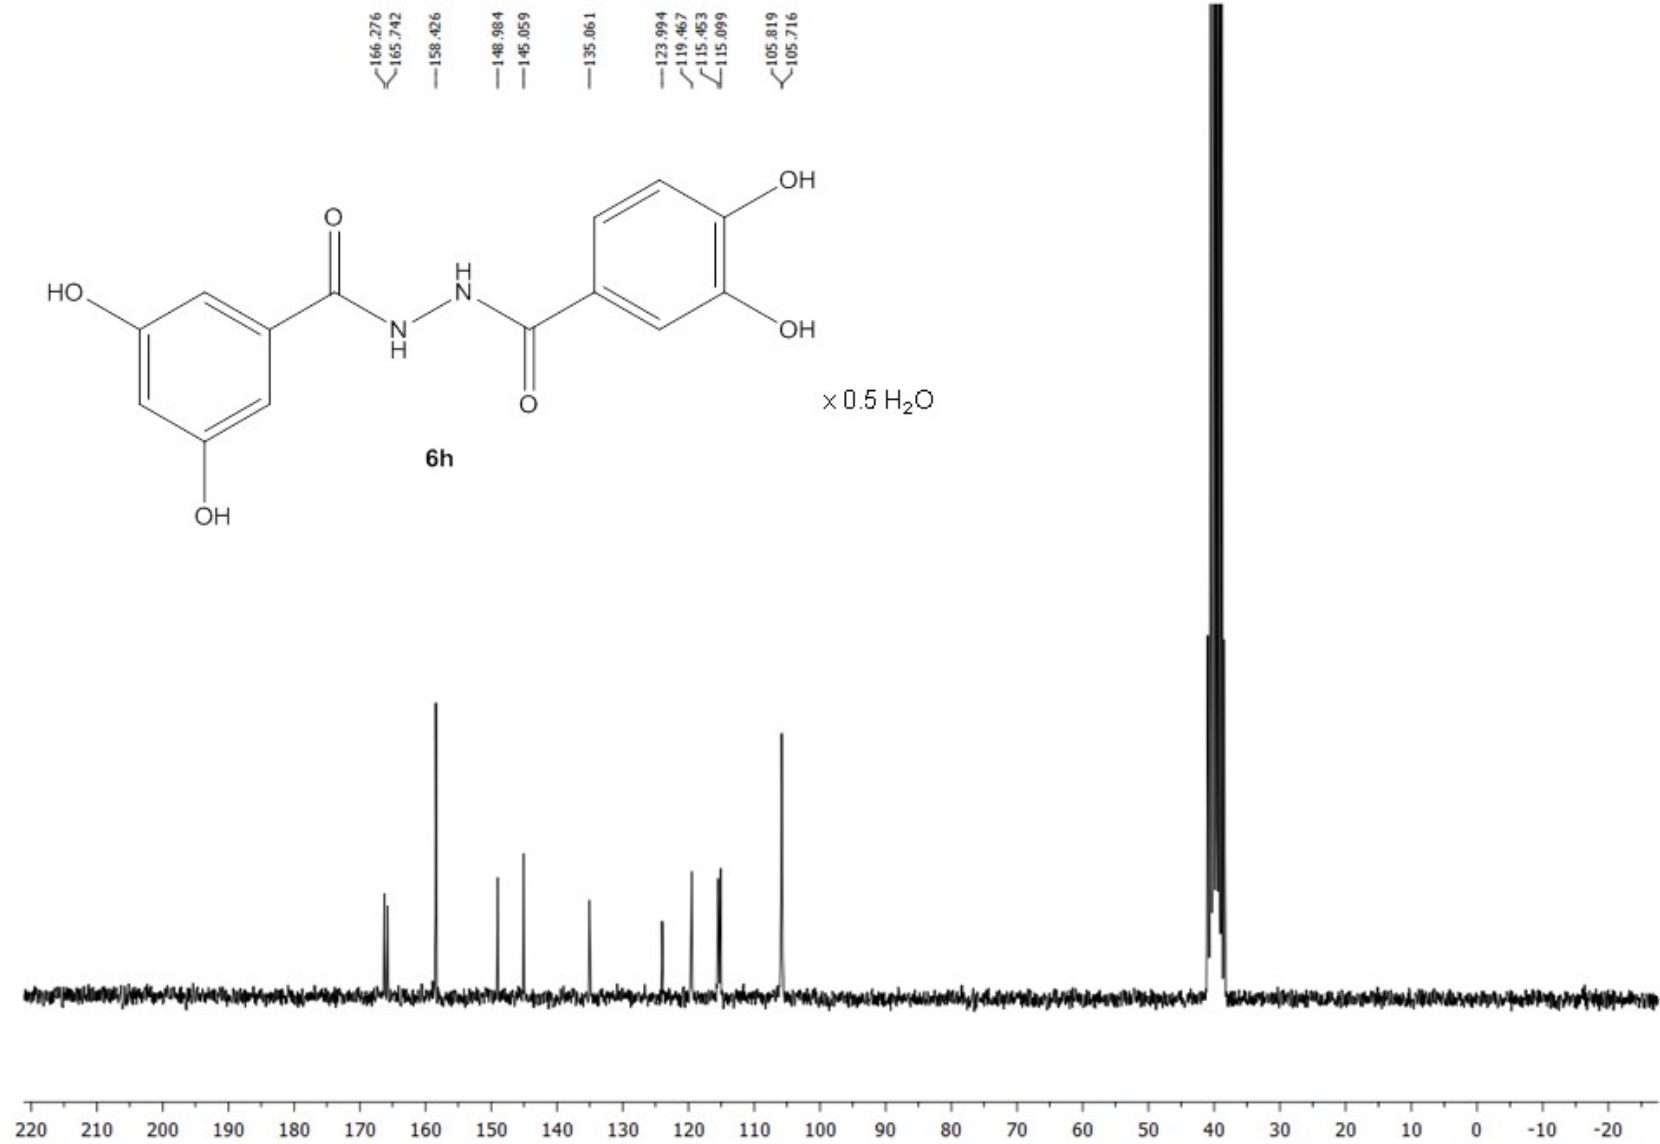

Figure S16.  $^{13}\text{C}$  NMR spectrum of **6h** in  $\text{DMSO-d}_6$  (50 MHz).

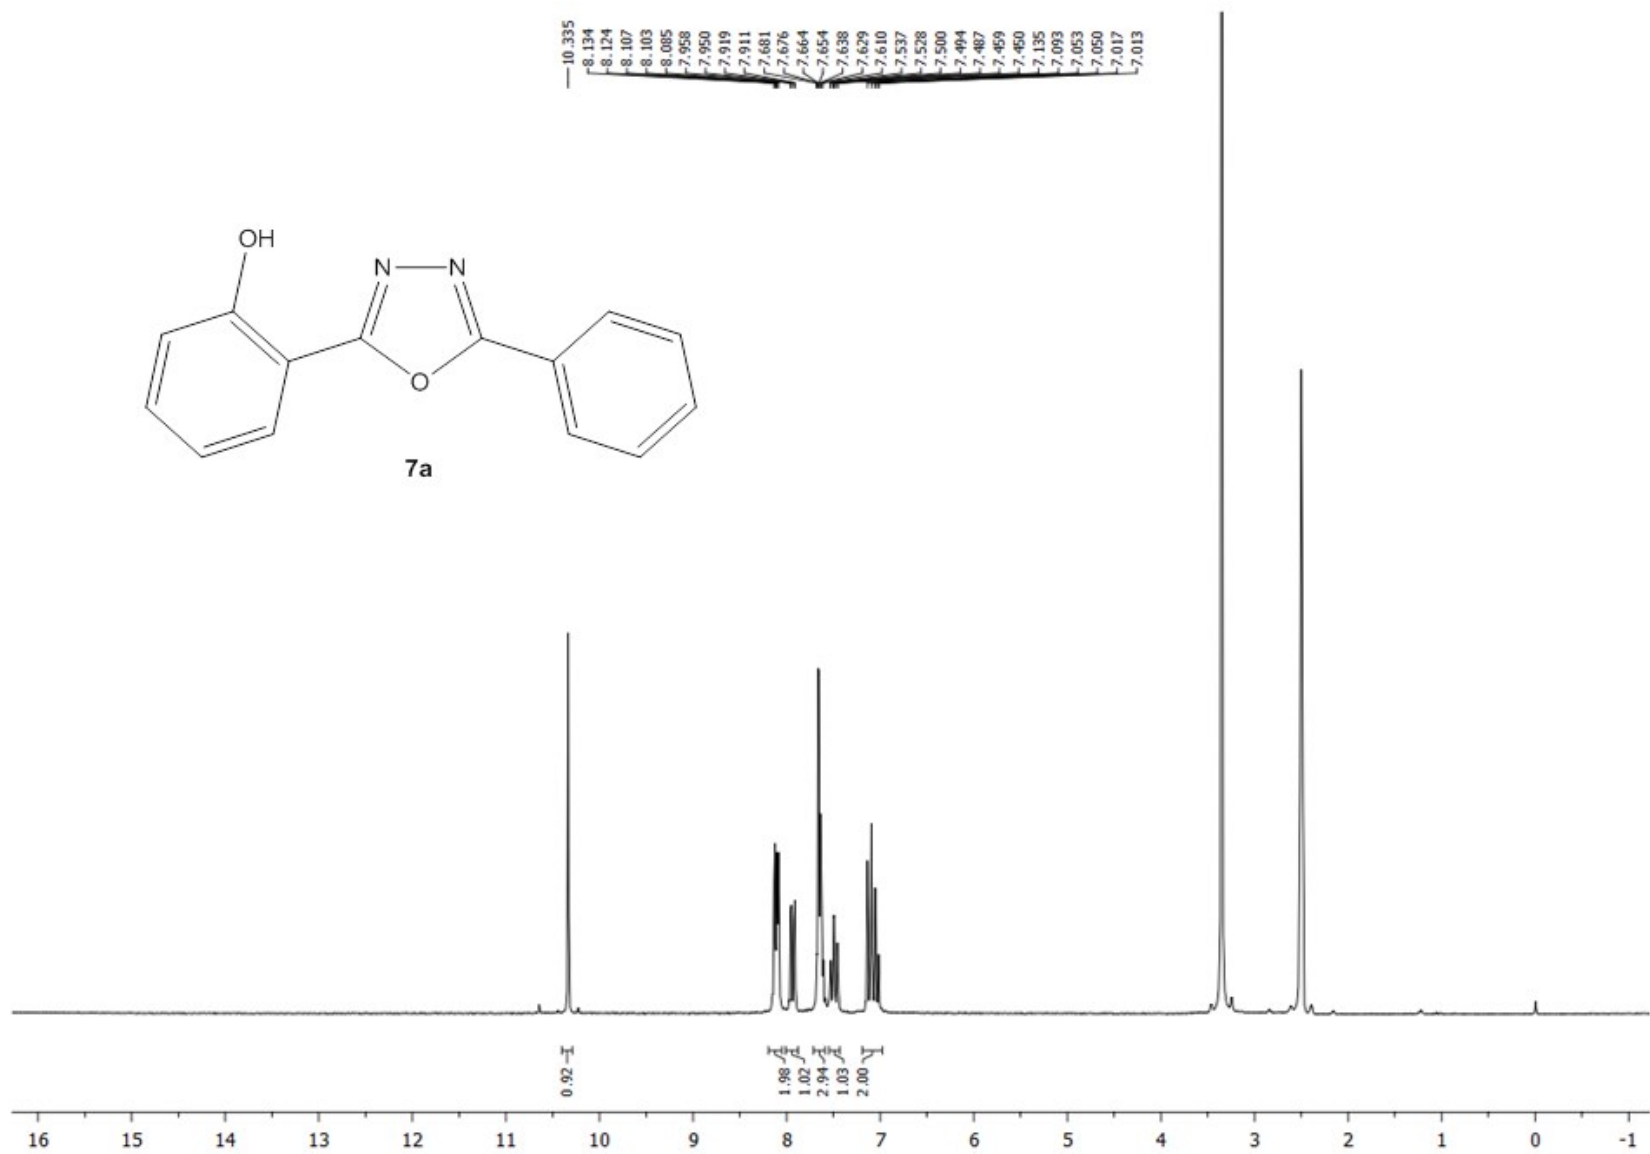

**Figure S17.** <sup>1</sup>H NMR spectrum of **7a** in DMSO-d<sub>6</sub> (200 MHz).

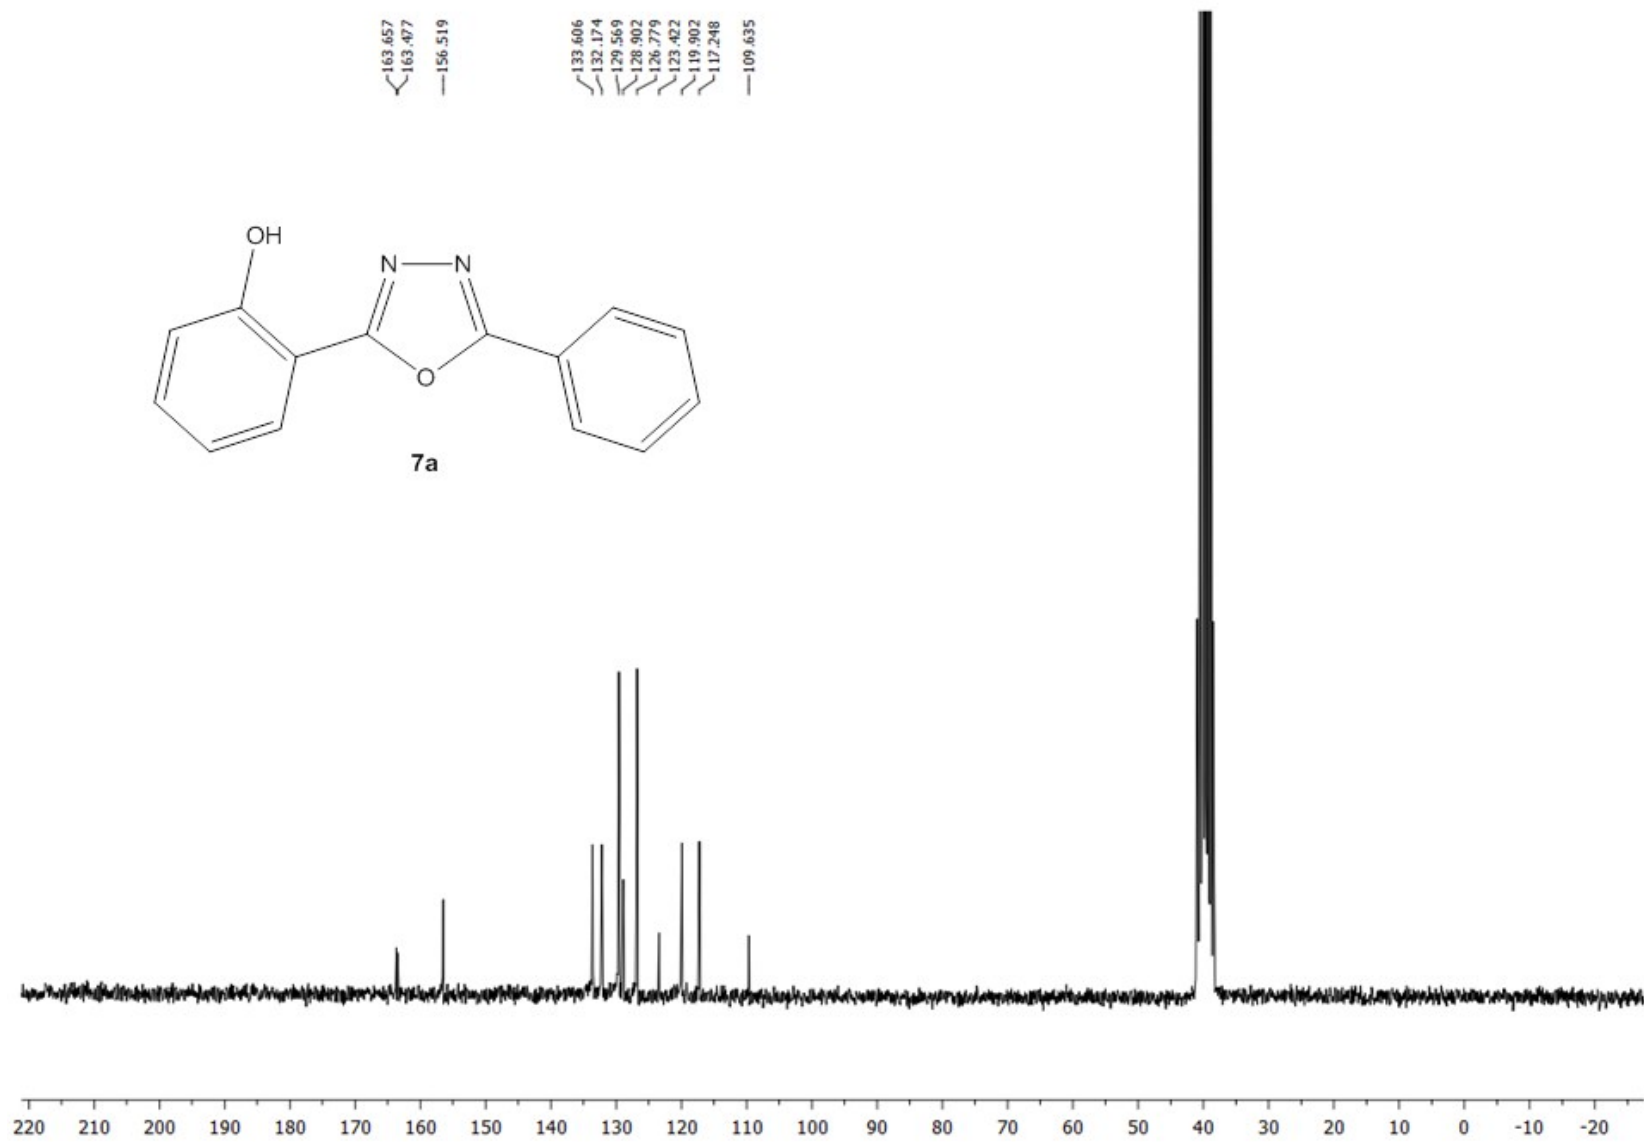

**Figure S18.**  $^{13}\text{C}$  NMR spectrum of **7a** in DMSO- $d_6$  (50 MHz).

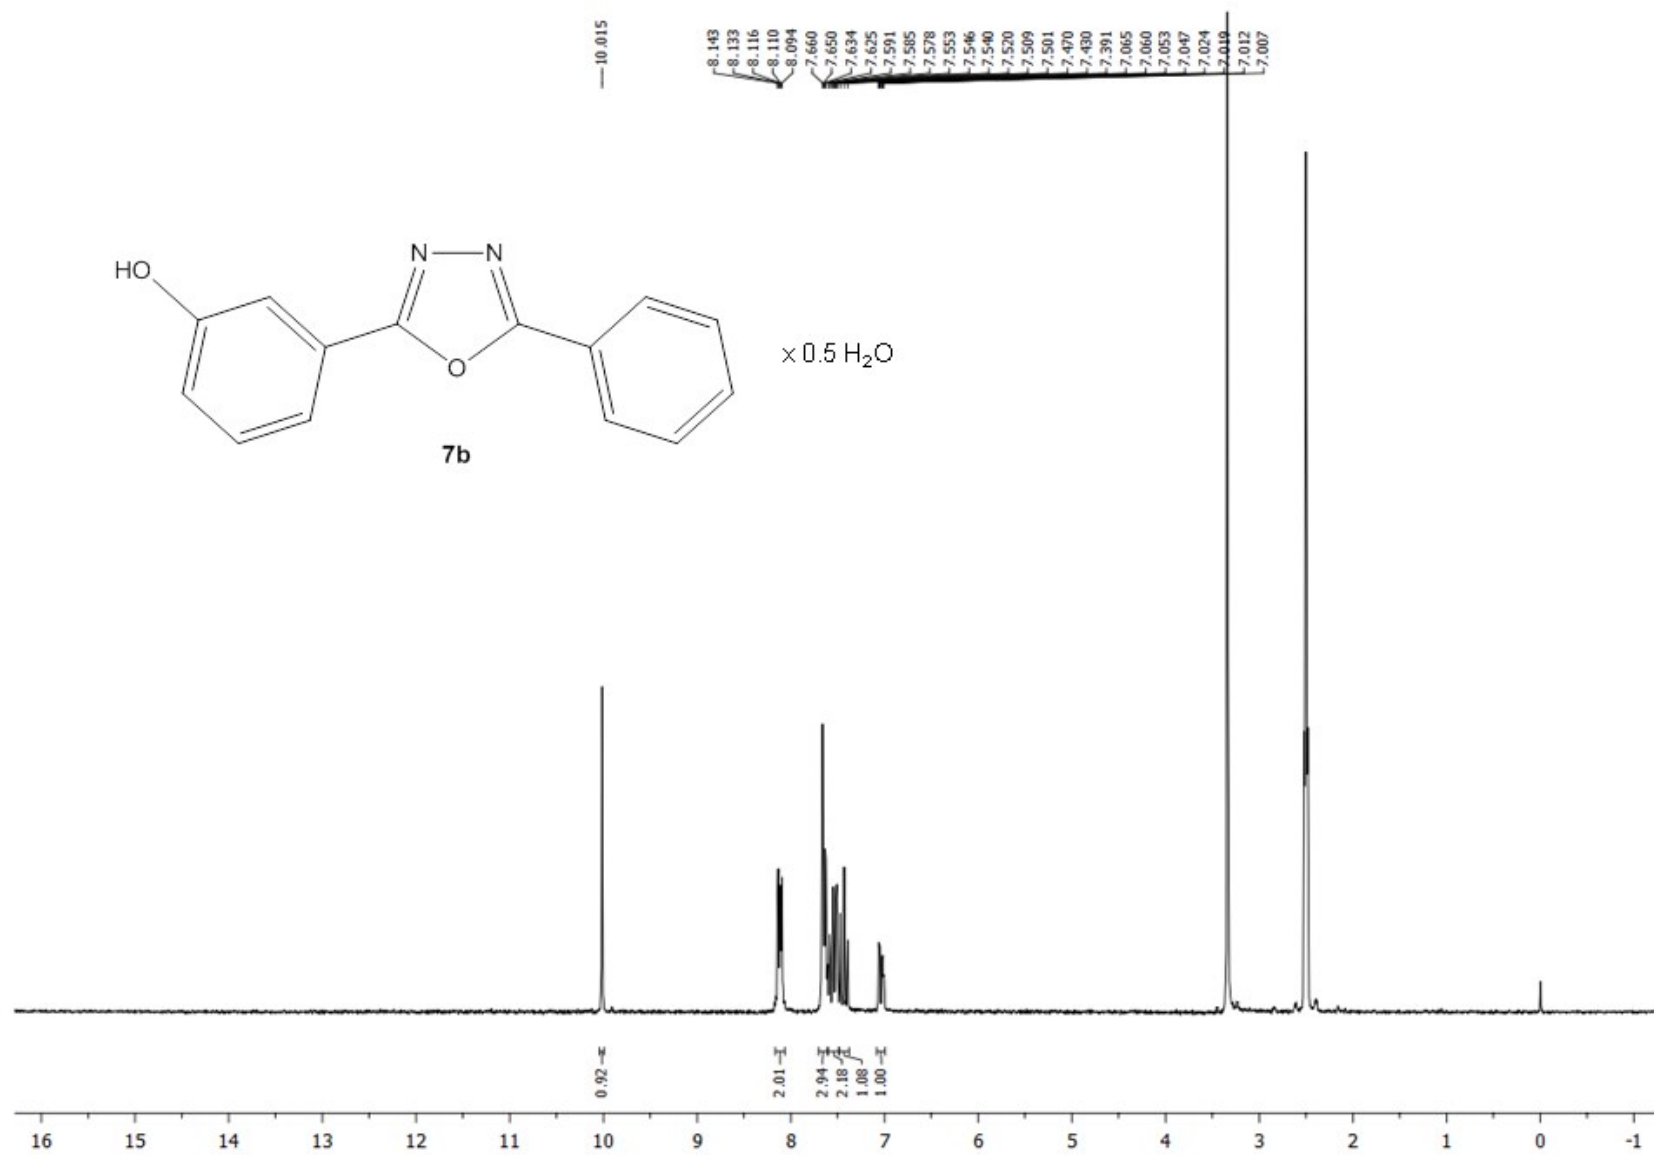

**Figure S19.** <sup>1</sup>H NMR spectrum of **7b** in DMSO-d<sub>6</sub> (200 MHz).

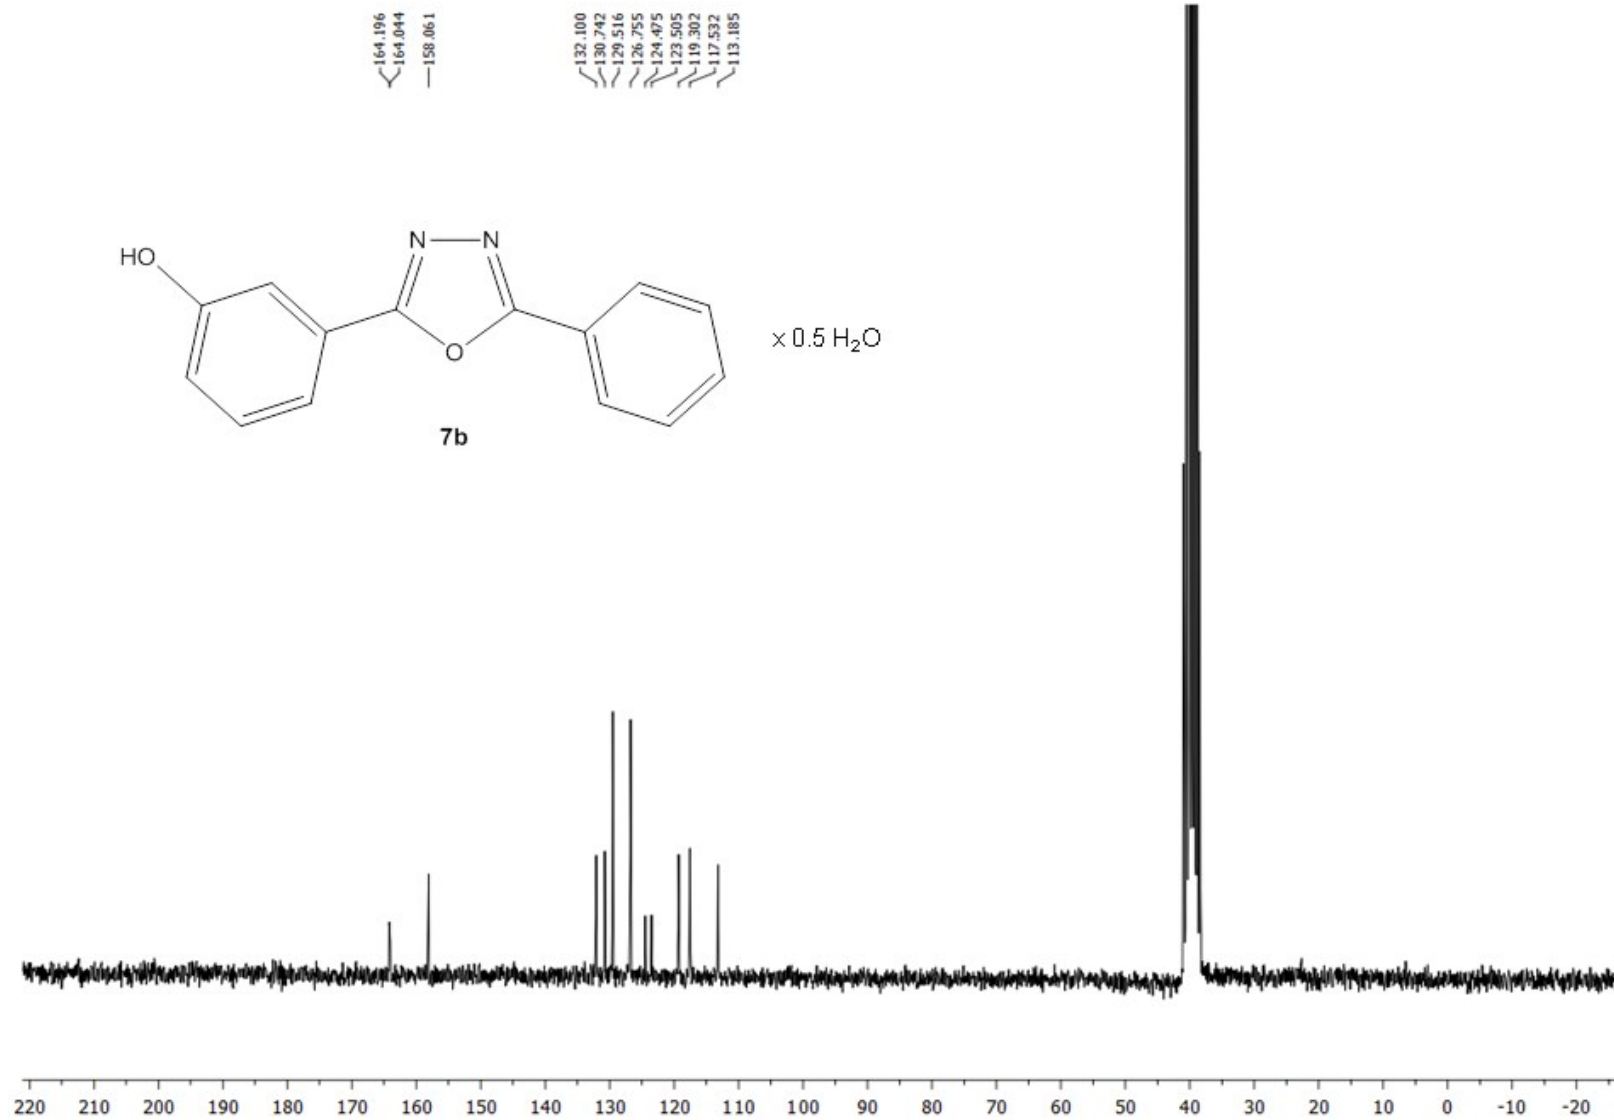

**Figure S20.**  $^{13}\text{C}$  NMR spectrum of **7b** in  $\text{DMSO-d}_6$  (50 MHz).

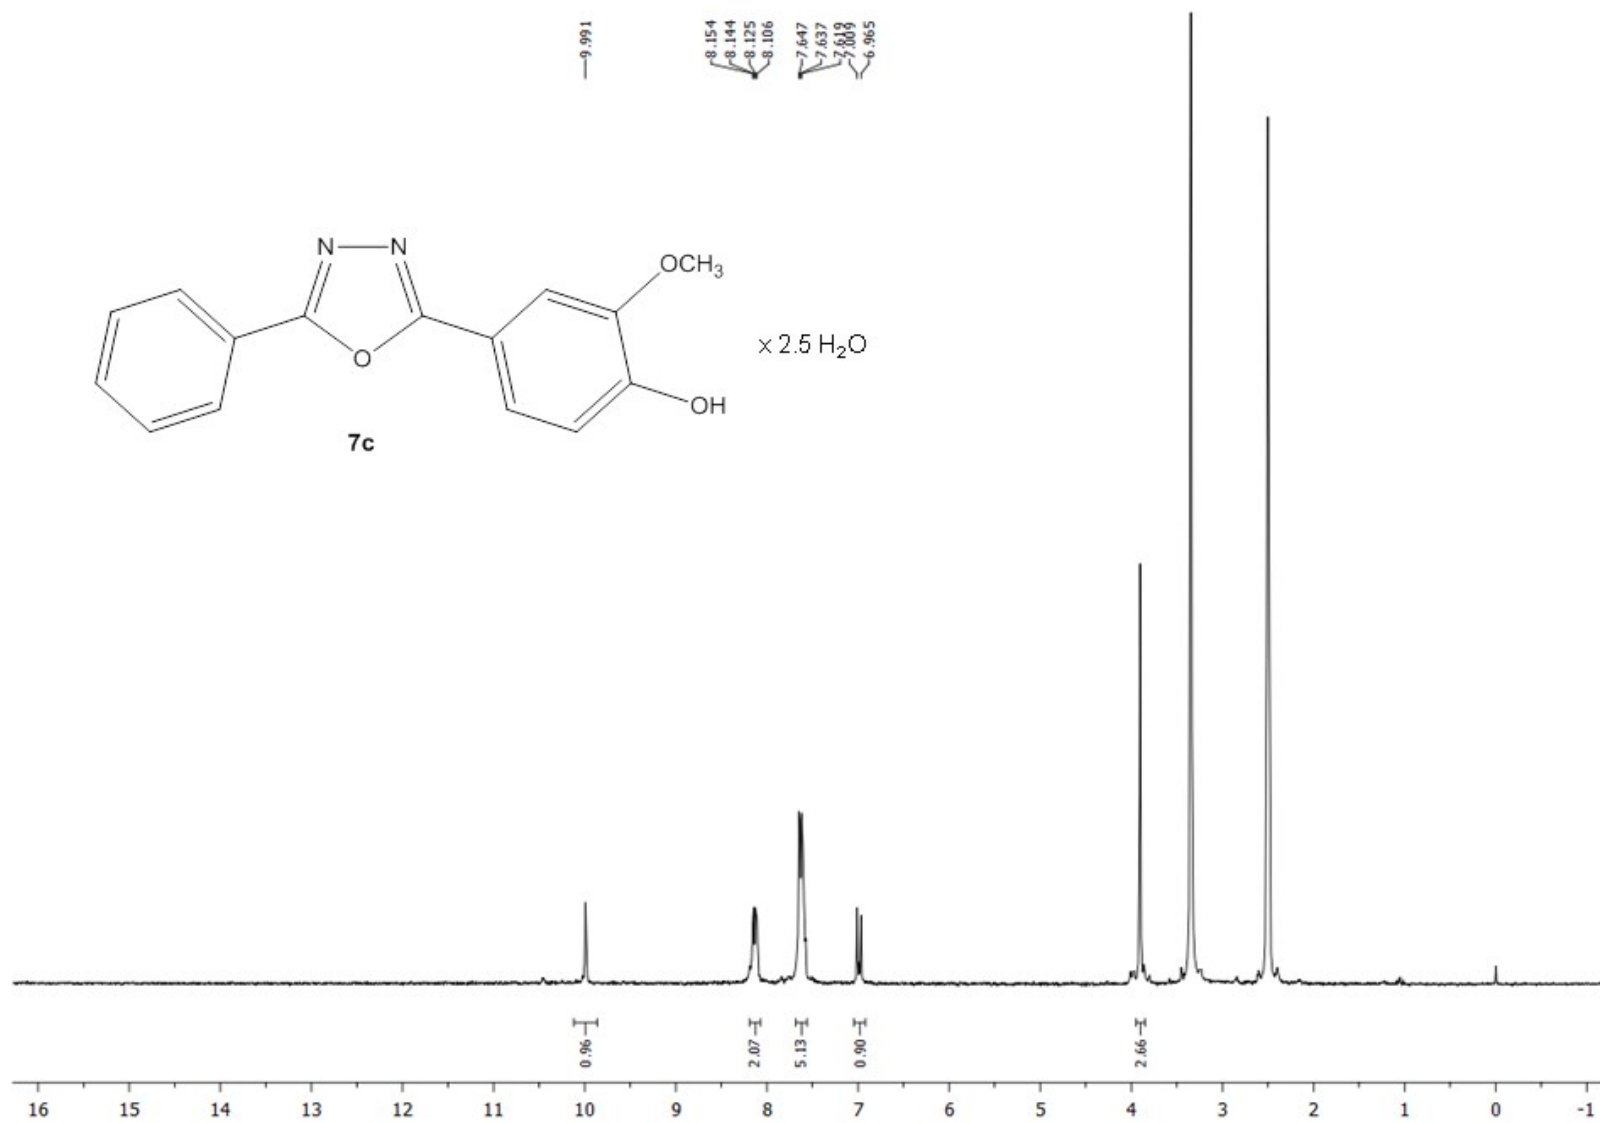

**Figure S21.**  $^1\text{H}$  NMR spectrum of **7c** in  $\text{DMSO-d}_6$  (200 MHz).



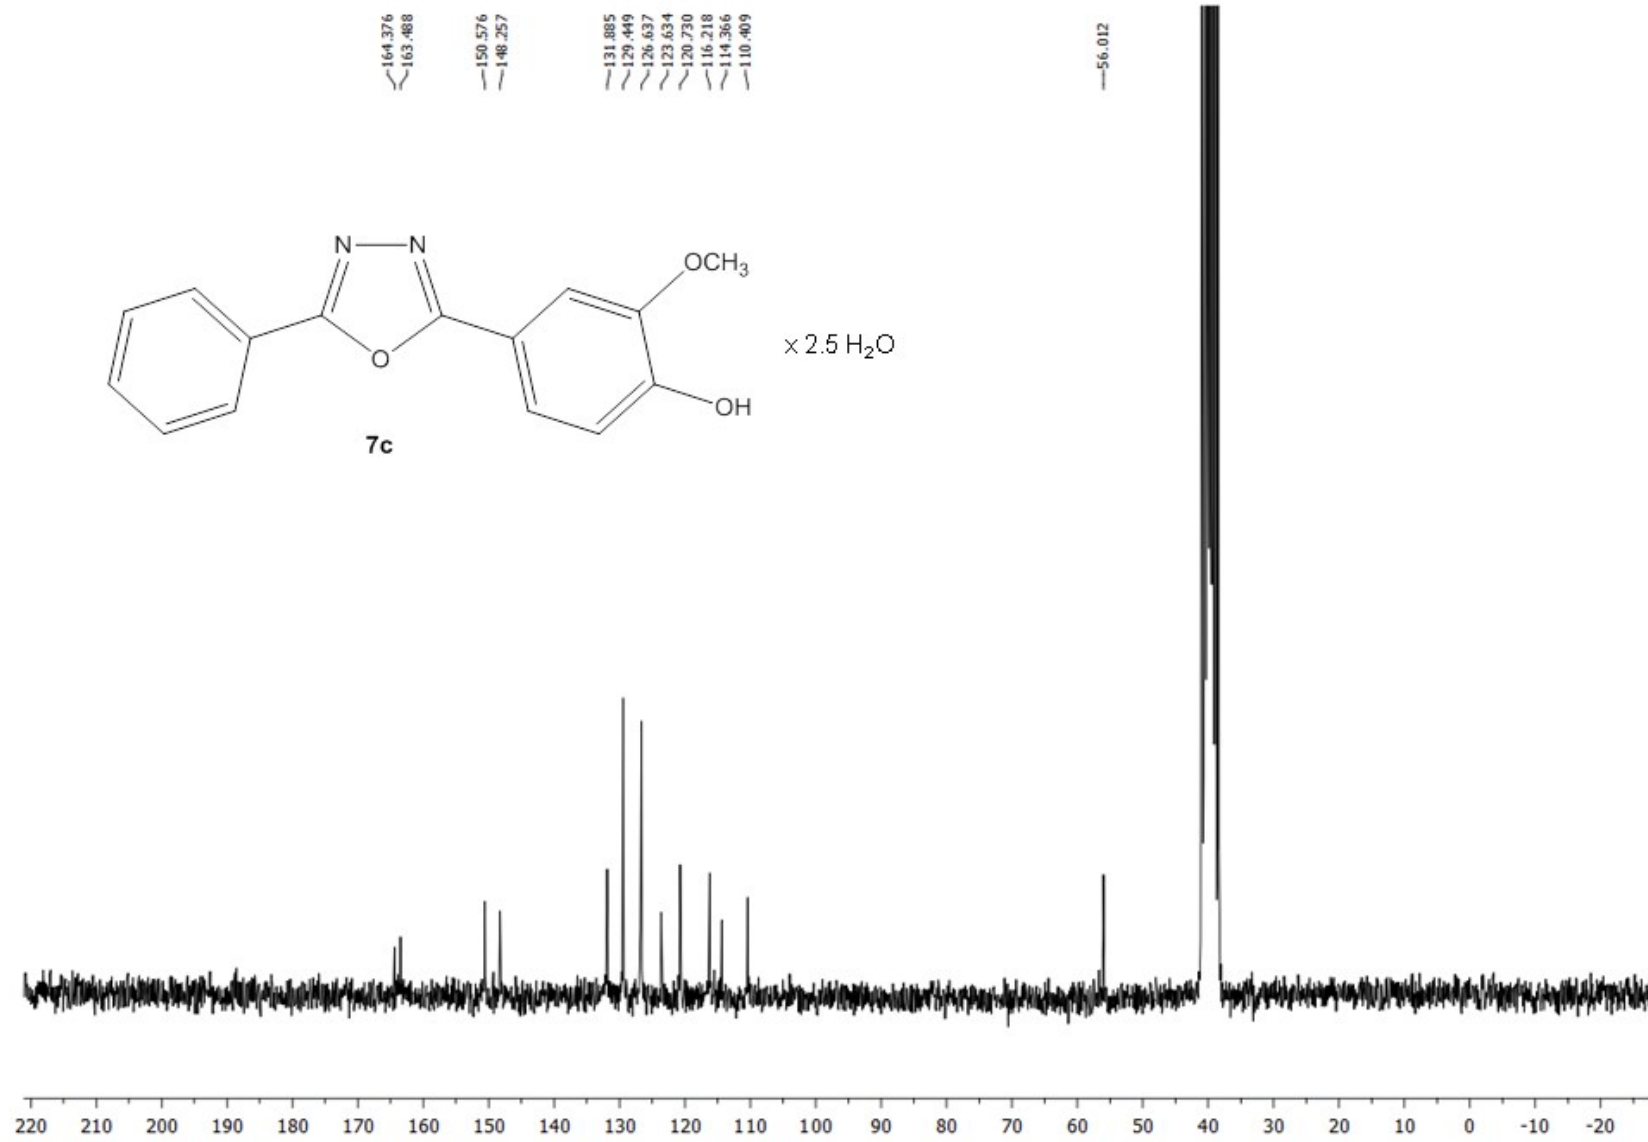

Figure S22. <sup>13</sup>C NMR spectrum of **7c** in DMSO-d<sub>6</sub> (50 MHz).

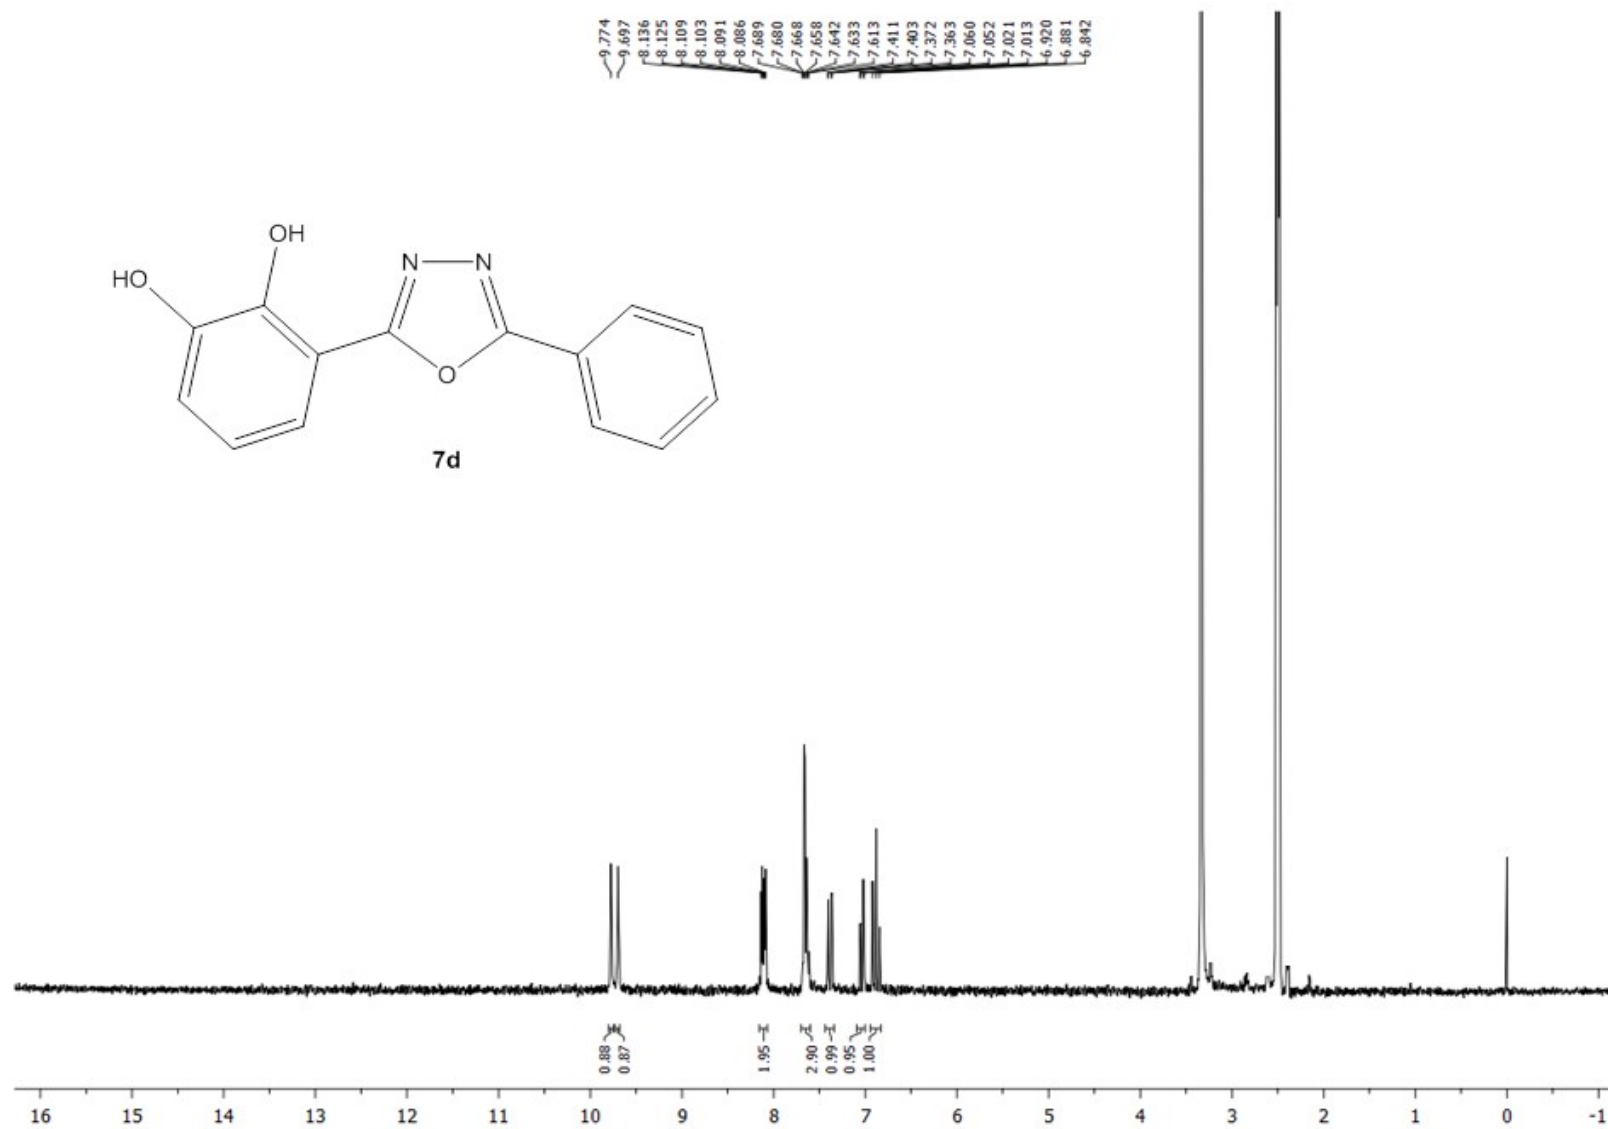

**Figure S23.** <sup>1</sup>H NMR spectrum of **7d** in DMSO-d<sub>6</sub> (200 MHz).

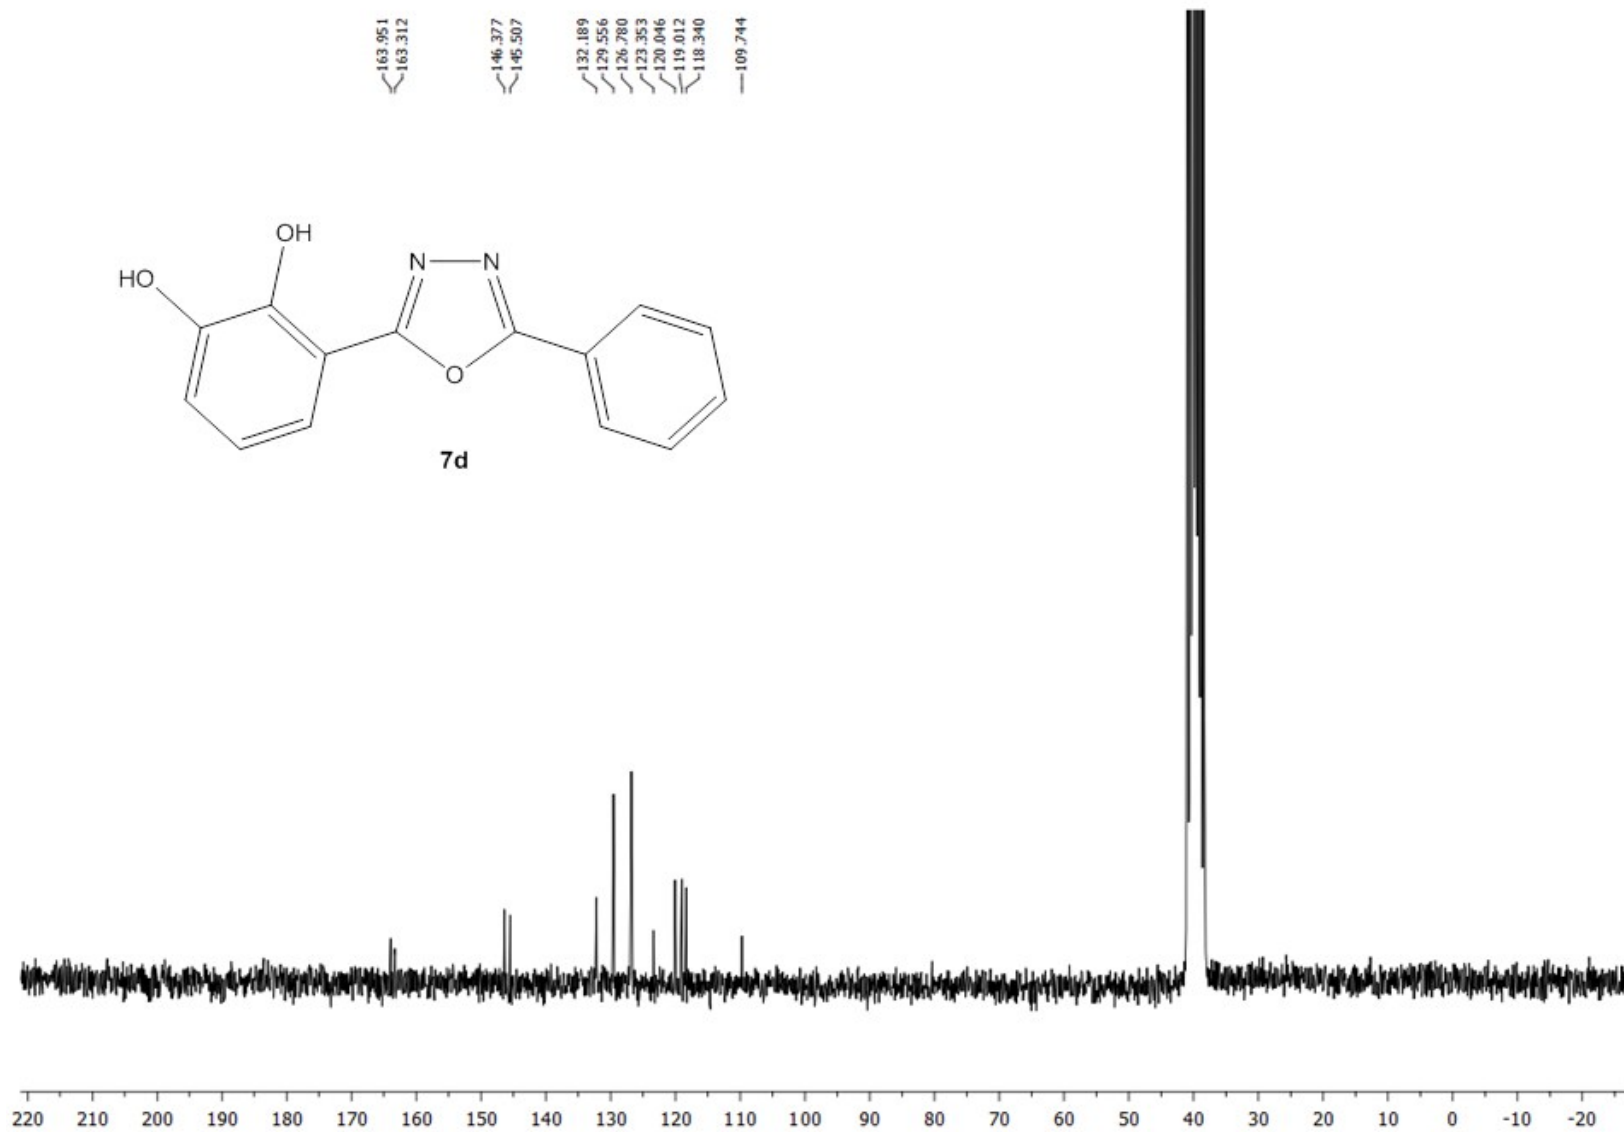

**Figure S24.**  $^{13}\text{C}$  NMR spectrum of **7d** in  $\text{DMSO-d}_6$  (50 MHz).

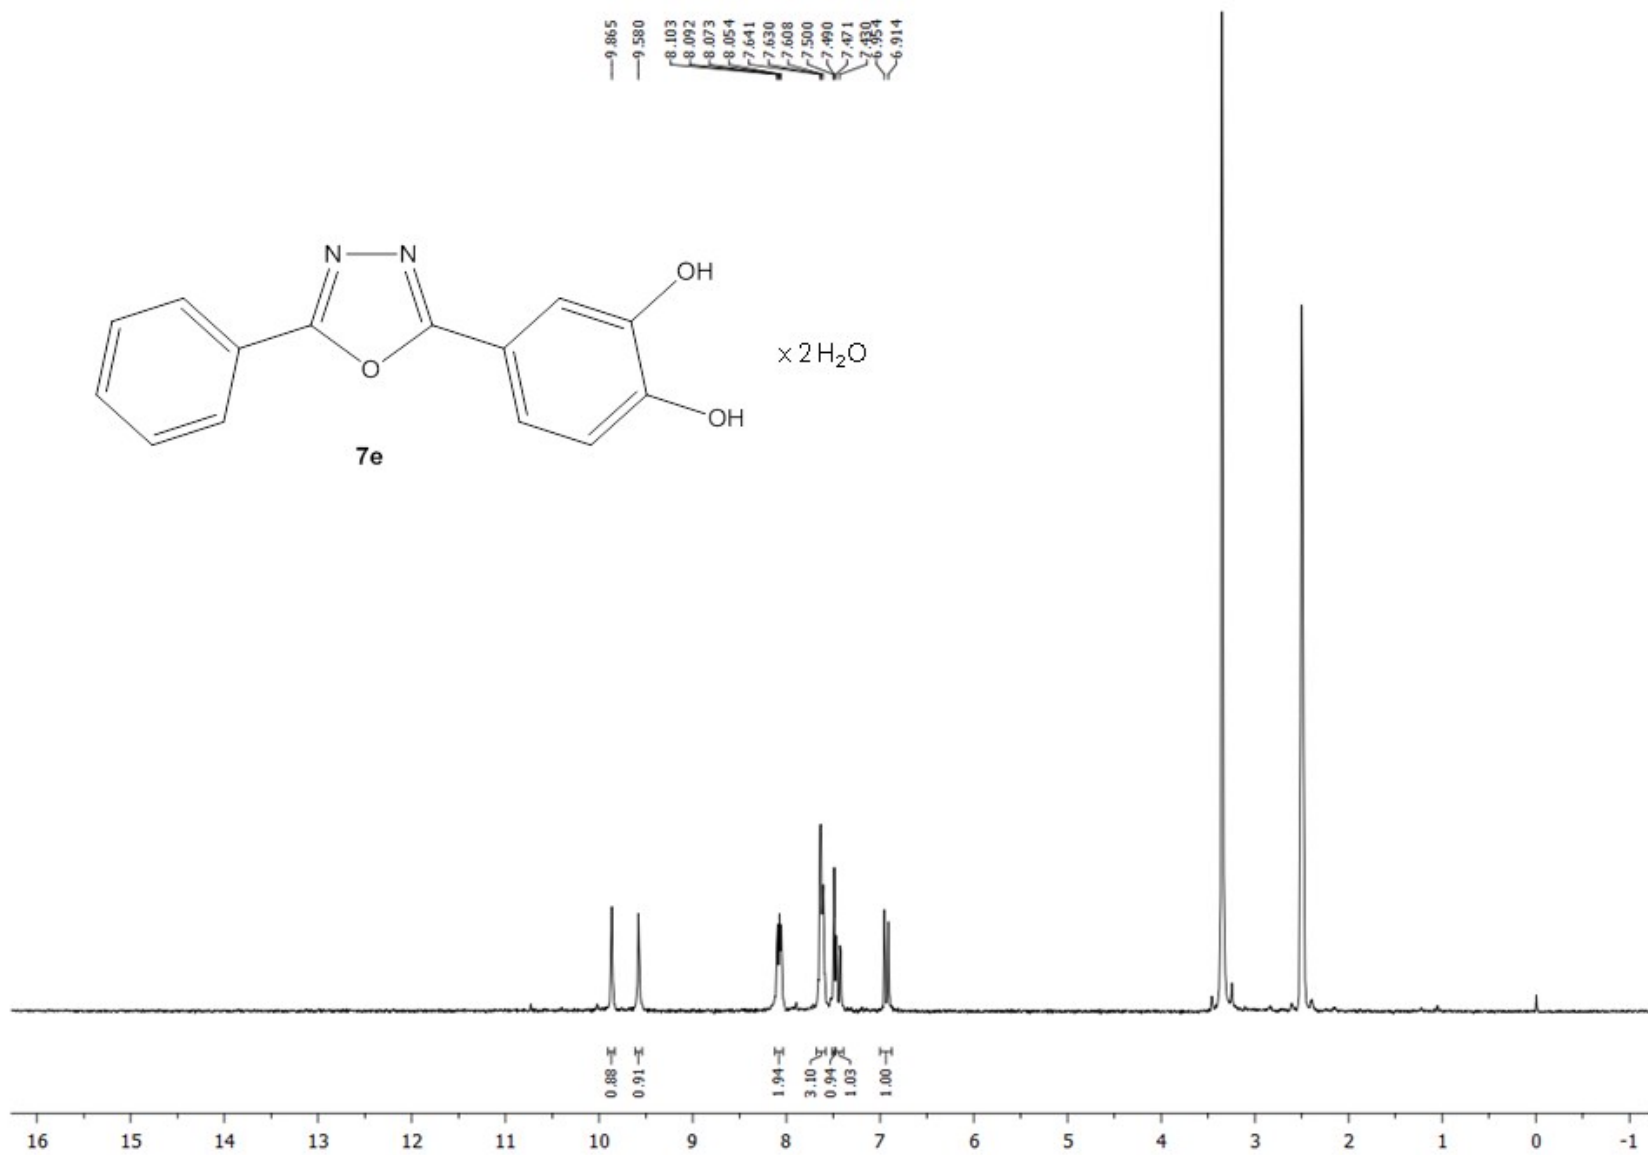

**Figure S25.**  $^1\text{H}$  NMR spectrum of **7e** in  $\text{DMSO-d}_6$  (200 MHz).

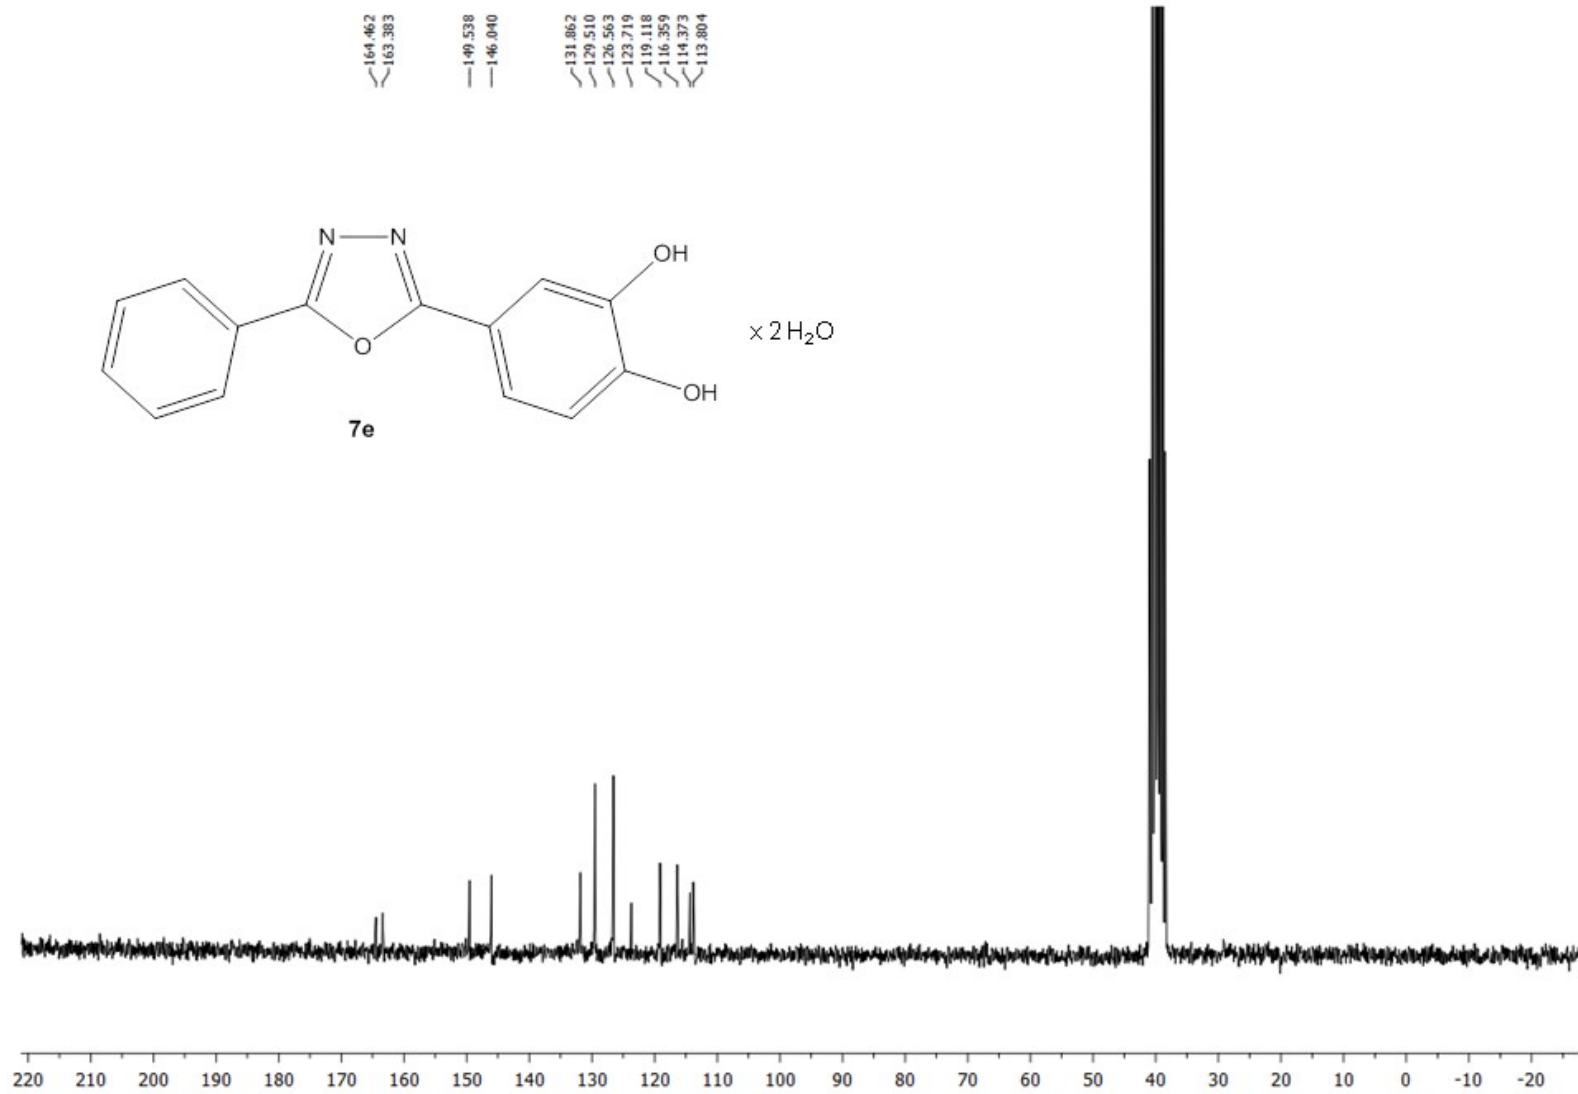

Figure S26. <sup>13</sup>C NMR spectrum of **7e** in DMSO-d<sub>6</sub> (50 MHz).

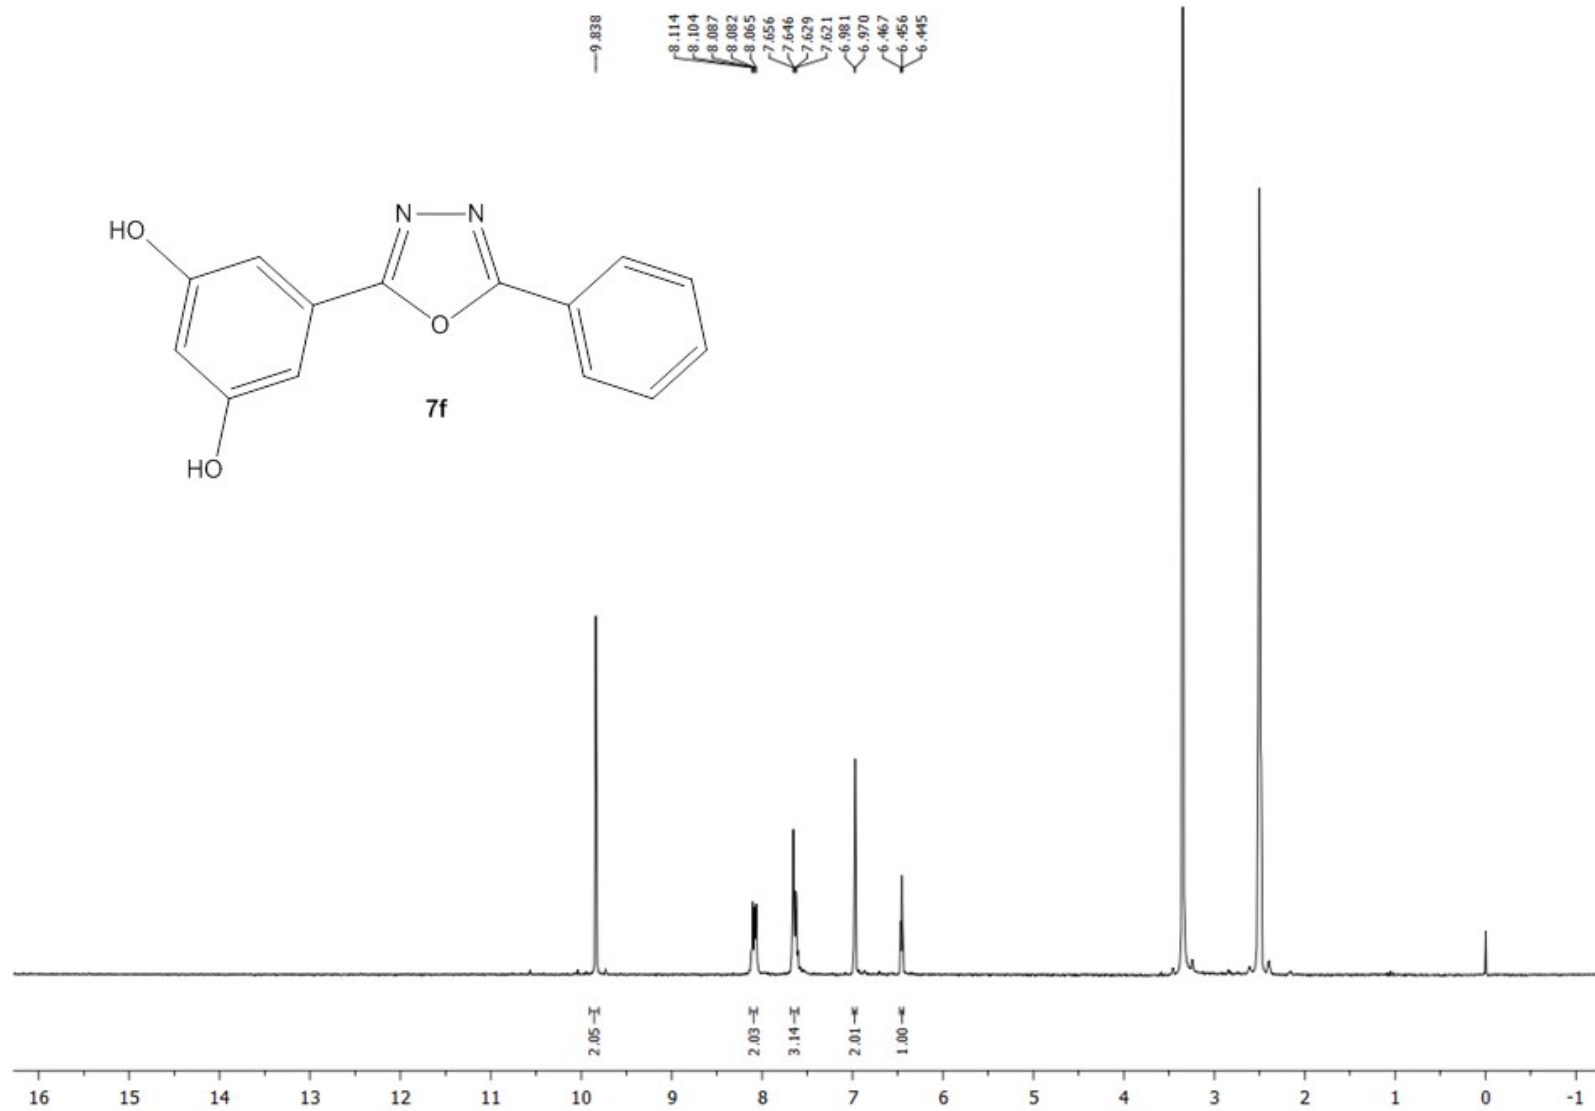

**Figure S27.**  $^1\text{H}$  NMR spectrum of **7f** in  $\text{DMSO-d}_6$  (200 MHz).

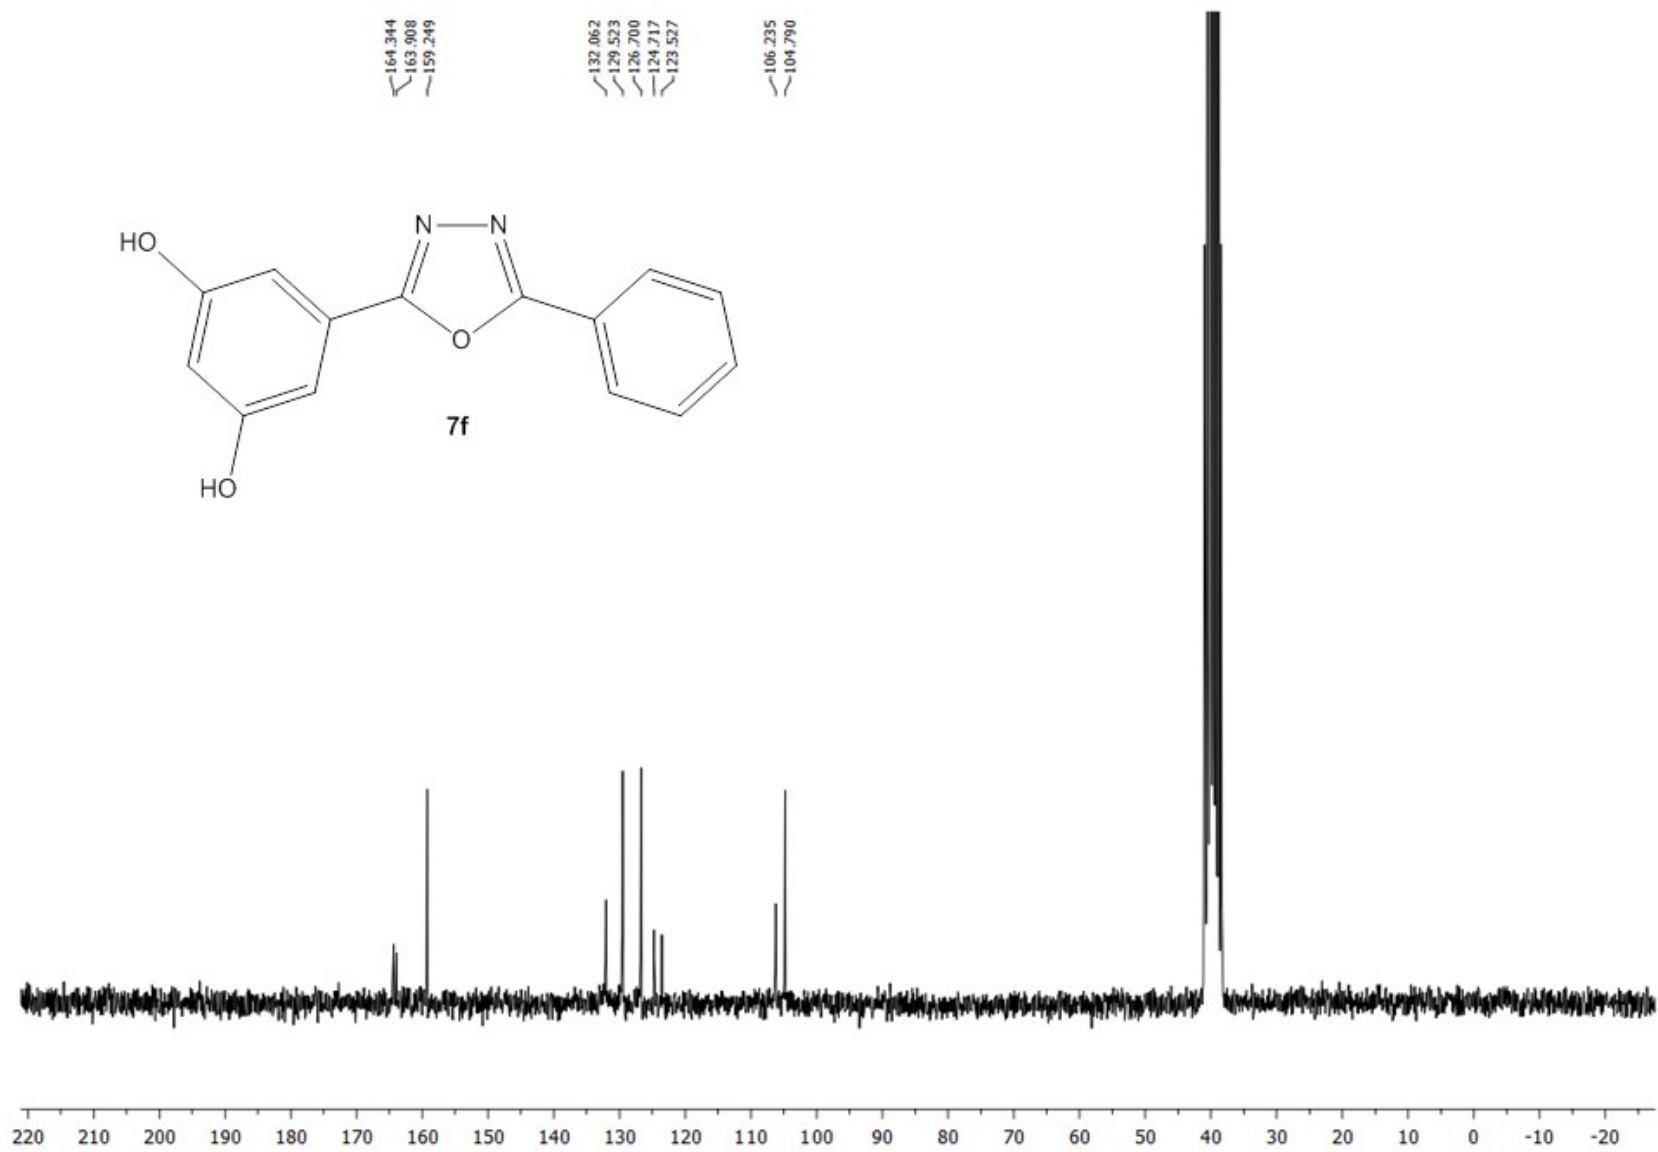

**Figure S28.**  $^{13}\text{C}$  NMR spectrum of **7f** in DMSO- $d_6$  (50 MHz).

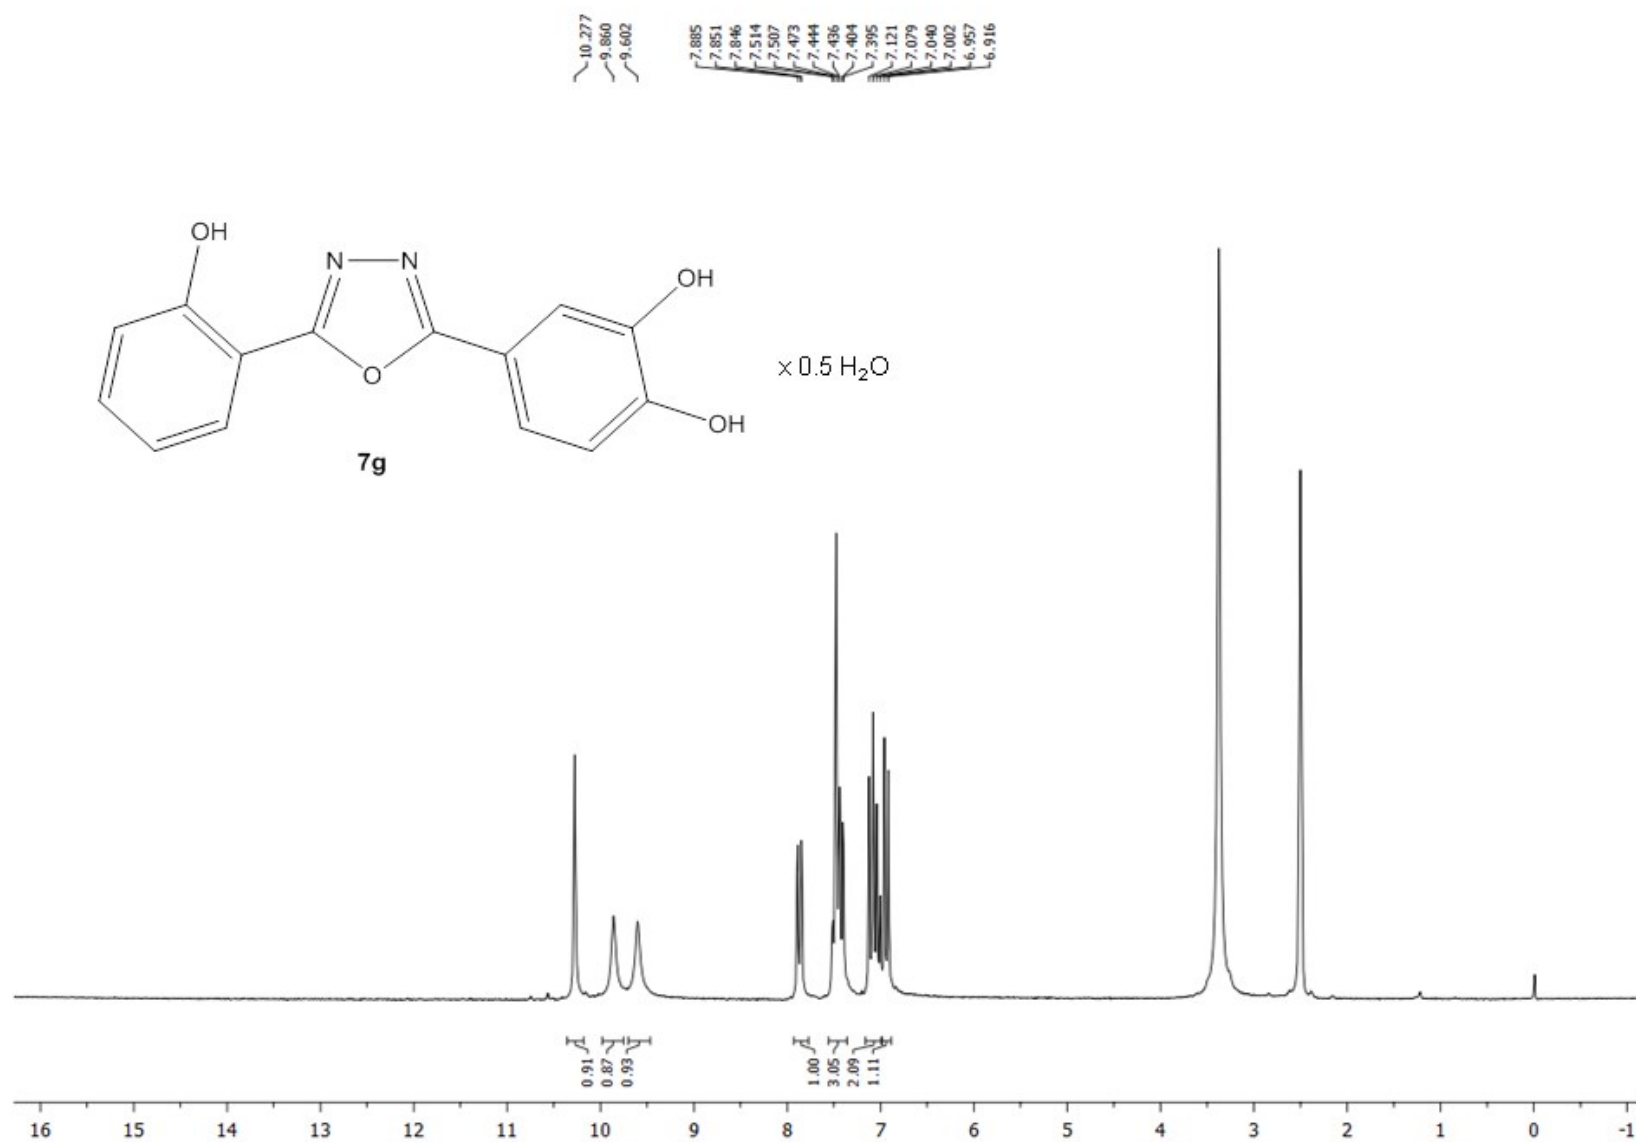

**Figure S29.**  $^1\text{H}$  NMR spectrum of **7g** in  $\text{DMSO-d}_6$  (200 MHz).



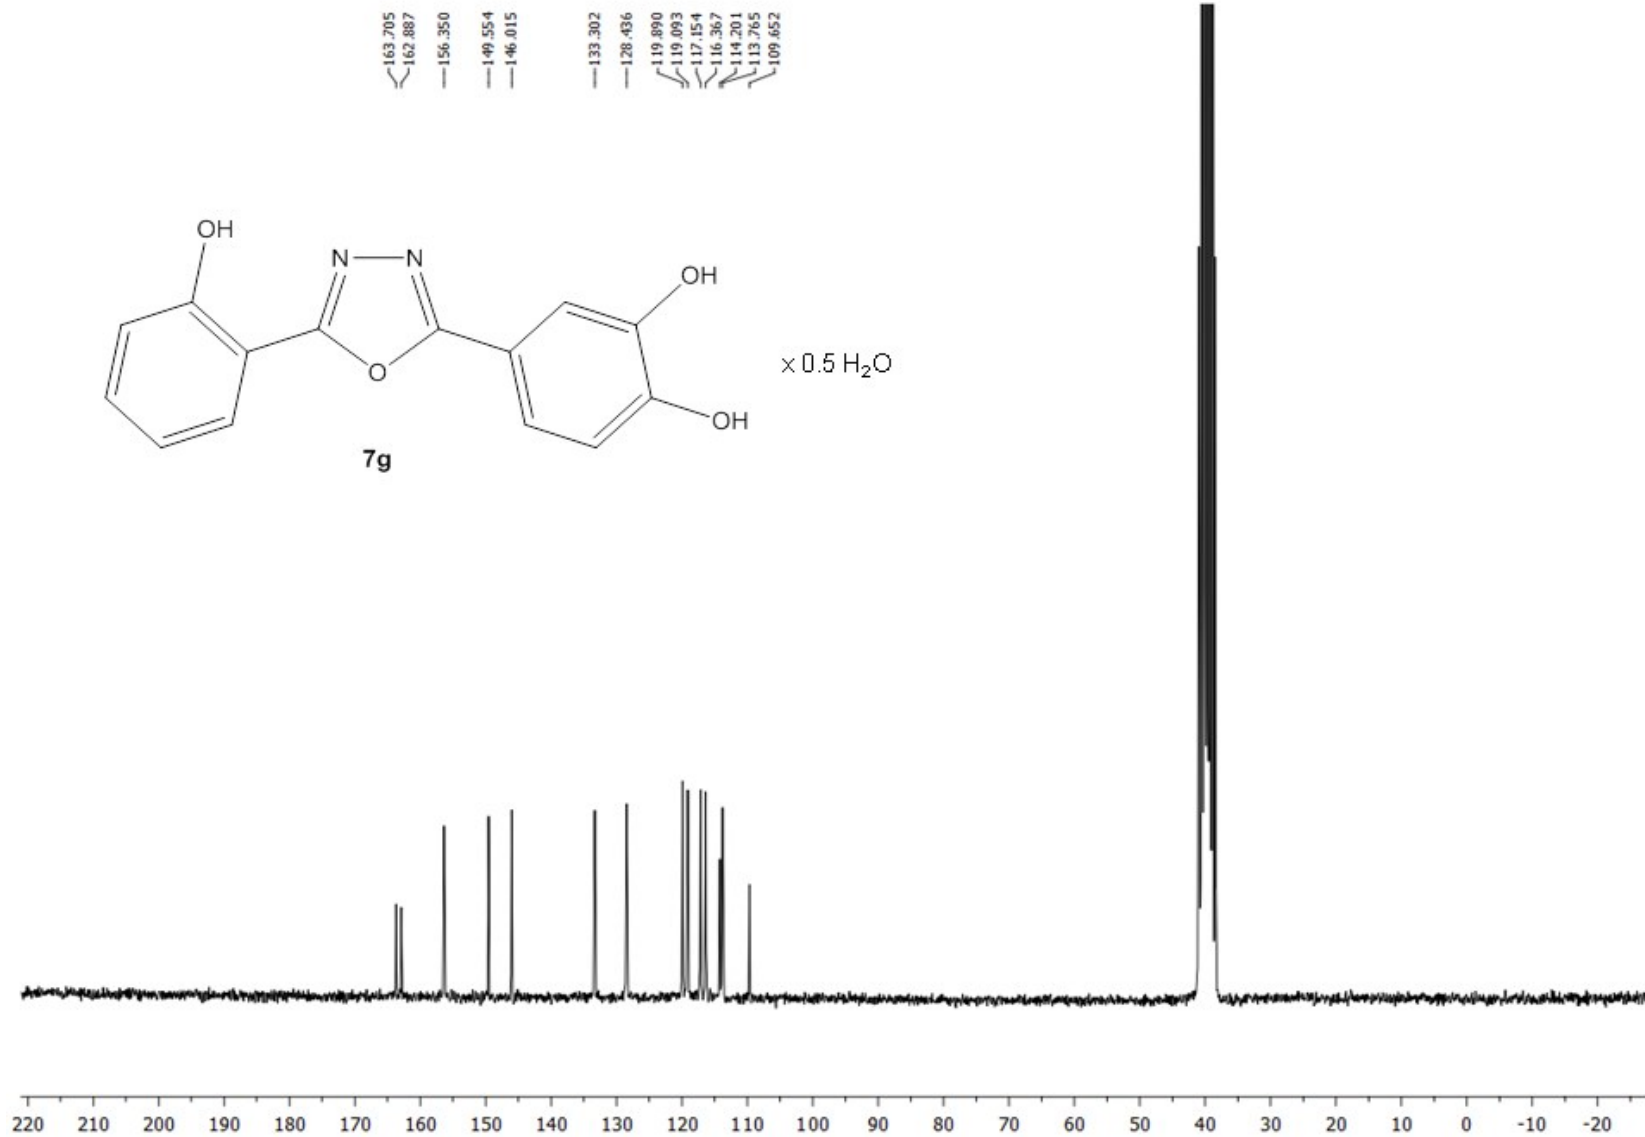

Figure S30.  $^{13}\text{C}$  NMR spectrum of **7g** in  $\text{DMSO-d}_6$  (50 MHz).

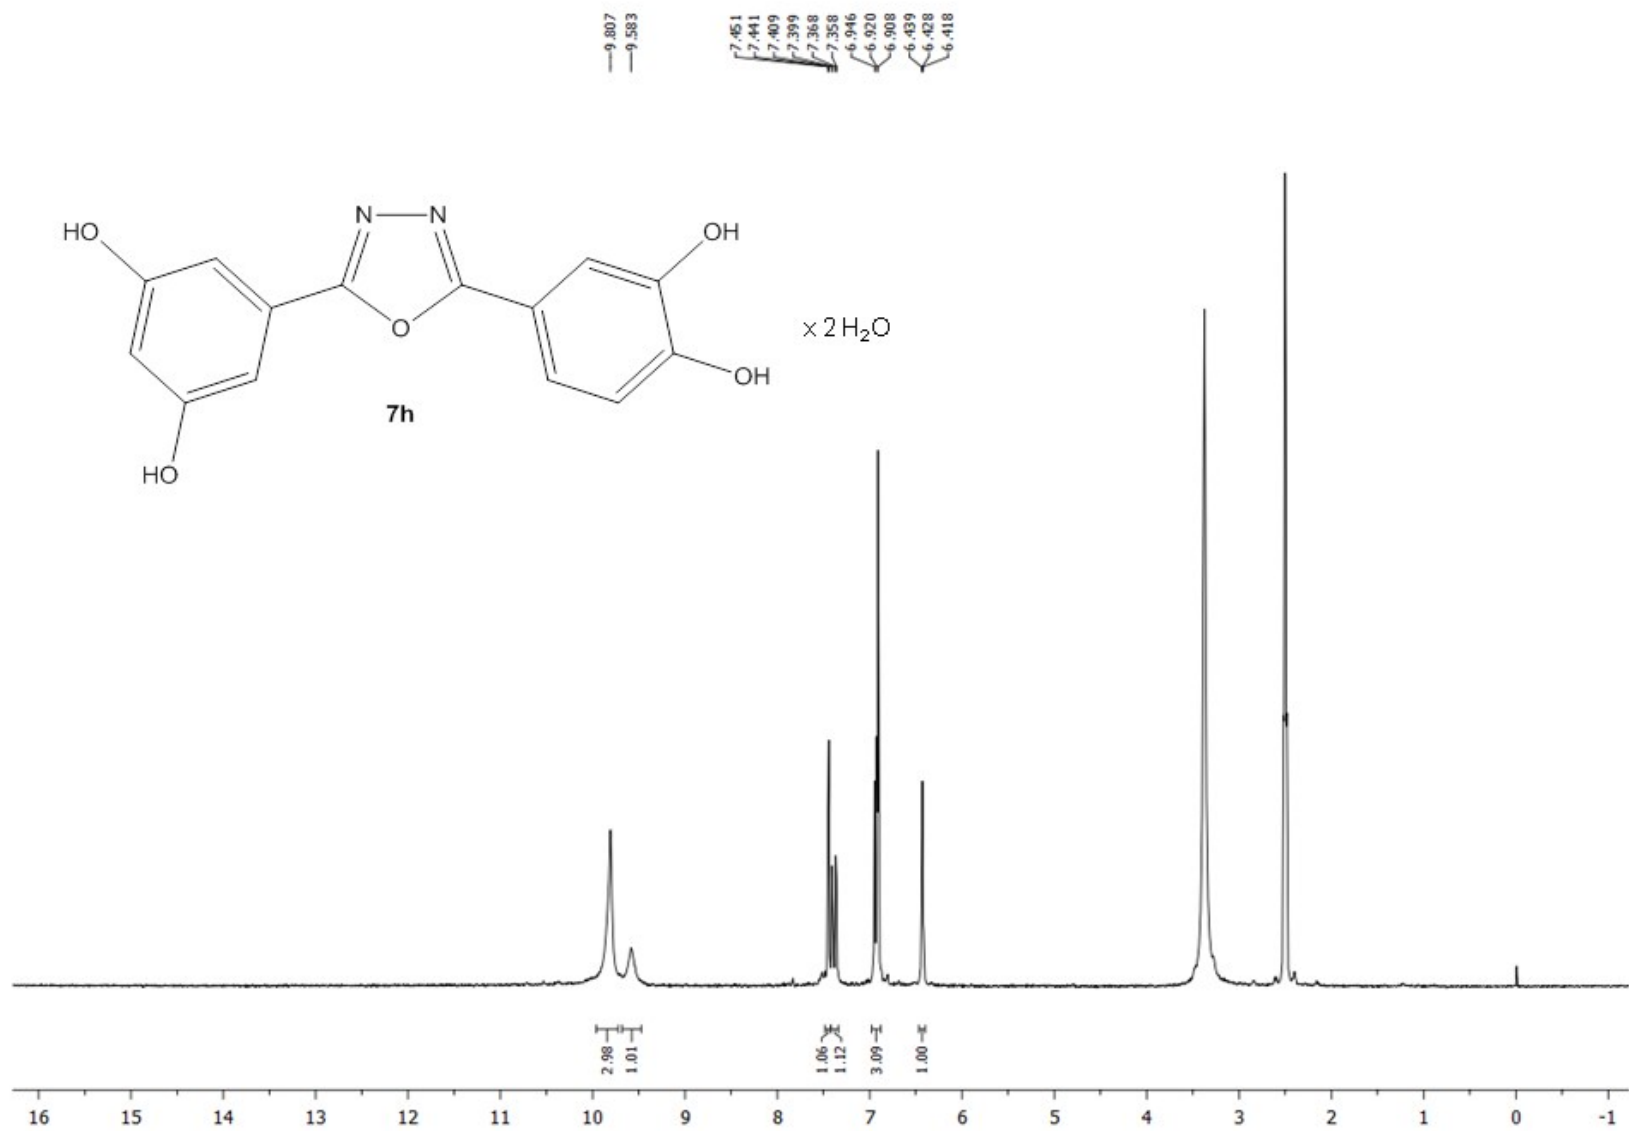

**Figure S31.**  $^1\text{H}$  NMR spectrum of **7h** in  $\text{DMSO-d}_6$  (200 MHz).

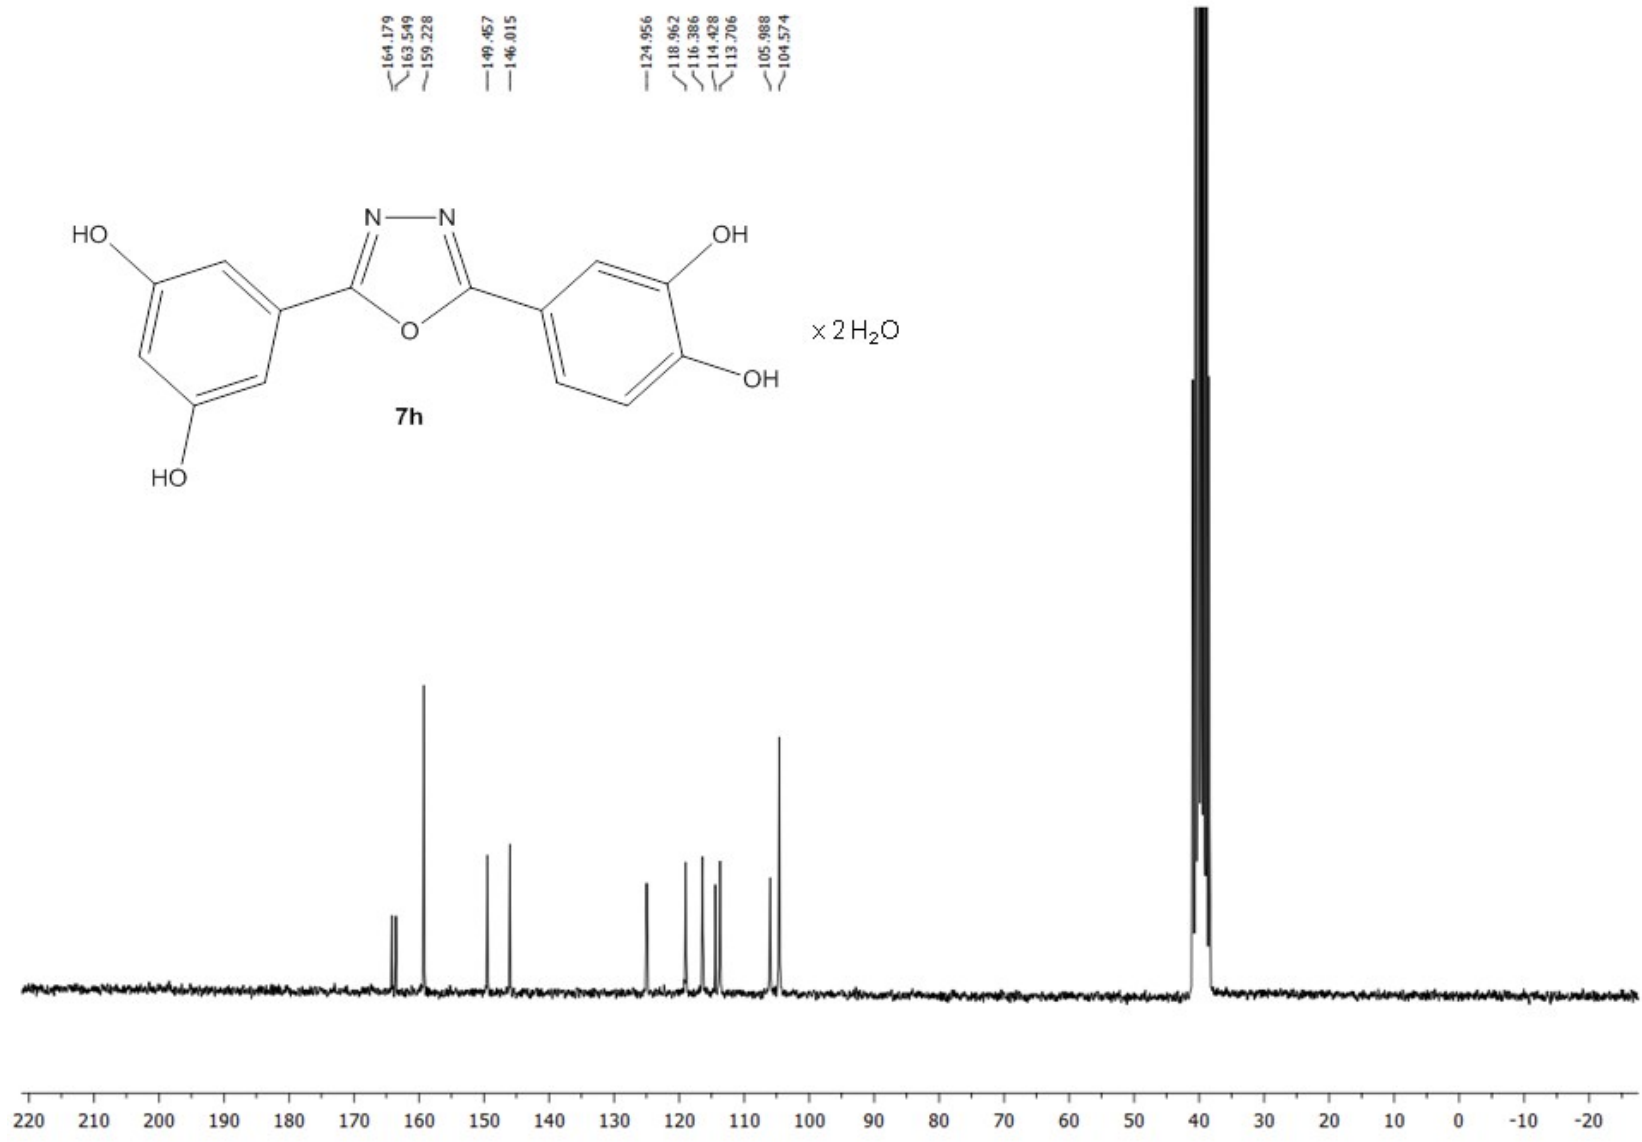

Figure S32.  $^{13}\text{C}$  NMR spectrum of **7h** in DMSO- $d_6$  (50 MHz).
